# Supplementary material for: Magnesocenophane‐Catalyzed Amine Borane Dehydrocoupling
Source: PubMed Central journal article supplement — Chemistry. 2020 Apr 28;26(28):6176–84. doi: 10.1002/chem.202000106 (PMC7318289; doi:10.1002/chem.202000106), 2020-04-28
Supplement: CHEM-26-6176-s001.pdf [file CHEM-26-6176-s001.pdf]

# Chemistry–A European Journal

Supporting Information

## **Magnesocenophane-Catalyzed Amine Borane Dehydrocoupling**

Lisa Wirtz, Wasim Haider, Volker Huch, Michael Zimmer, and André Schäfer\*<sup>[a]</sup>

|                                |            |          |            |
|--------------------------------|------------|----------|------------|
| <b>Experimental Procedures</b> | <b>S3</b>  | <b>—</b> | <b>S4</b>  |
| <b>Reaction Monitoring</b>     | <b>S5</b>  | <b>—</b> | <b>S10</b> |
| <b>NMR spectra</b>             | <b>S11</b> | <b>—</b> | <b>S17</b> |
| <b>MS spectra</b>              | <b>S18</b> |          |            |
| <b>XRD data</b>                | <b>S19</b> | <b>—</b> | <b>S20</b> |
| <b>Computational Details</b>   | <b>S21</b> | <b>—</b> | <b>S34</b> |
| <b>References</b>              | <b>S35</b> |          |            |

## SUPPORTING INFORMATION

## Experimental Procedures

All manipulations were carried out under an argon inert gas atmosphere (argon 5.0), using either Schlenk line techniques or a glovebox.  $\text{Me}_2\text{NH}\cdot\text{BH}_3$  was purchased from ABCR and used as received.  $\text{Me}_2\text{NH}_2\text{Cl}$  was purchased from Alfa Aesar and used as received. 2,2-dicyclopentadienylpropane,<sup>1</sup> magnesocene and magnesocenophanes, **1b-d**,<sup>2</sup> diisopropylamine borane, **2b**,<sup>3</sup> and methylamine borane, **2c**,<sup>4</sup> linear diborazane, **3b**,<sup>5</sup> and N-deuterated derivative of dimethylamine borane, **2aND**<sup>6</sup> were synthesized according to literature known procedures.

NMR spectra were recorded on Bruker Avance III 300 and Bruker Avance III 400 spectrometers.  $^1\text{H}$  and  $^{13}\text{C}$  NMR spectra were referenced using the solvent signals.<sup>7</sup>  $^{11}\text{B}$  NMR spectra were referenced using an external standard ( $\delta^{11}\text{B}(\text{BF}_3\cdot\text{OEt}_2) = 0$ ). Mass spectrometry was performed on a Bruker Solarix FT-ICR MS 7 Tesla spectrometer. Single crystal X-ray diffraction analysis were carried out at low temperatures on a Bruker AXS X8 Apex CCD diffractometer and on a Bruker AXS D8 Venture diffractometer operating with graphite monochromated Mo K $\alpha$  radiation. Structure solution and refinement were performed using SHELX.<sup>8</sup>

**Synthesis of C[1]magnesocenophane 1a:**

This compound had been described before,<sup>9</sup> and was synthesized by a modified procedure:

To a solution of 24.0 g (139 mmol) 2,2-dicyclopentadienylpropane in hexane was added 199 mL of a solution of *n*-butyl-sec-butylmagnesium (139 mmol, 0.7 M in hexane) at 273 K. The mixture was allowed to warm to room temperature and subsequently stirred over night at 333 K. After filtration, the precipitate was washed with small portions of cold hexane and dried *in vacuo*.

Yield: 16.9 g / 56%.

$\delta^1\text{H}$  (400.13 MHz,  $\text{C}_6\text{D}_6/\text{dme}$ ) = 2.35 (s, 6 H,  $\text{CH}_3$ ), 6.02 (t,  $^3J_{\text{HH}} = 2.5$  Hz, 4 H, Cp-H), 6.08 (t,  $^3J_{\text{HH}} = 2.5$  Hz, 4 H, Cp-H);

$\delta^1\text{H}$  (400.13 MHz,  $\text{C}_6\text{D}_6/\text{thf}$ ) = 1.39 (THF), 2.27 (s, 6 H,  $\text{CH}_3$ ), 3.51 (THF), 6.07 (t,  $^3J_{\text{HH}} = 2$  Hz, 4 H, Cp-H), 6.15 (t,  $^3J_{\text{HH}} = 2$  Hz, 4 H, Cp-H);

$\delta^1\text{H}$  (400.13 MHz, thf-D8) = 1.71 (s, 6 H,  $\text{CH}_3$ ), 5.60 (t,  $^3J_{\text{HH}} = 2$  Hz, 4 H, Cp-H), 5.76 (t,  $^3J_{\text{HH}} = 2$  Hz, 4 H, Cp-H);

$\delta^{13}\text{C}\{^1\text{H}\}$  (100.62 MHz,  $\text{C}_6\text{D}_6/\text{dme}$ ) = 27.6 ( $\text{CH}_3$ ), 38.5 ( $\text{C}-\text{CH}_3$ ), 96.0 (Cp), 107.1 (Cp);

$\delta^{13}\text{C}\{^1\text{H}\}$  (100.62 MHz,  $\text{C}_6\text{D}_6/\text{thf}$ ) = 25.7 (THF), 29.1 ( $\text{CH}_3$ ), 37.8 ( $\text{C}-\text{CH}_3$ ), 68.1 (THF), 95.7 (Cp), 108.1 (Cp), 141.3 (Cp);

$\delta^{13}\text{C}\{^1\text{H}\}$  (100.62 MHz, thf-D8) = 29.2 ( $\text{CH}_3$ ), 37.8 ( $\text{C}-\text{CH}_3$ ), 95.6 (Cp), 108.2 (Cp), 141.3 (Cp).

**Synthesis of 2aBD:**

Note:  $\text{Me}_2\text{NH}\cdot\text{BD}_3$ , **2aBD**, cannot be synthesized by treatment of  $\text{Me}_2\text{NH}_2\text{Cl}$  with  $\text{NaBD}_4$ .<sup>6</sup>

Dimethylammoniumchlorid was N-deuterated by repeatedly stirring it in  $\text{D}_2\text{O}$ . Full N-deuteration was confirmed by  $^1\text{H}$  NMR spectroscopy. 1.50 g (18.0 mmol) of N-deuterated dimethylammoniumchlorid and 0.75 g (17.9 mmol) of sodium borodeuteride were added to a Schlenk flask and cooled to 273 K. 75 mL of precooled thf were added and the solution was stirred for 1 h at 273 K and subsequently allowed to warm to room temperature and stirred over night. The mixture was filtered, all volatiles were removed *in vacuo* and the crude was stirred in water for 5 h to allow for N-D/H exchange. The product was subsequently extracted with dichloromethane and dried *in vacuo*.

Yield: 0.44 g / 40%.

$\delta^1\text{H}$  (400.13 MHz,  $\text{C}_6\text{D}_6$ ) = 1.78 (d, 6 H,  $\text{CH}_3$ ), 2.82 (br s, 1 H, NH);

$\delta^{13}\text{C}\{^1\text{H}\}$  (100.62 MHz,  $\text{C}_6\text{D}_6$ ) = 43.8 ( $\text{CH}_3$ );

$\delta^{11}\text{B}$  (128.38 MHz,  $\text{C}_6\text{D}_6$ ) = -13.4 (m,  $\text{BD}_3$ ).

**Synthesis of 2aNDBD:**

Dimethylammoniumchlorid was N-deuterated by repeatedly stirring it in  $\text{D}_2\text{O}$ . Full N-deuteration was confirmed by  $^1\text{H}$  NMR spectroscopy. 2.0 g (23.9 mmol) of N-deuterated dimethylammoniumchlorid and 1.0 g (23.9 mmol) of sodium borodeuteride were added to a Schlenk flask and cooled to 273 K. 100 mL of precooled thf were added and the solution was stirred for 1 h at 273 K and subsequently allowed to warm to room temperature and stirred over night. All volatiles were removed *in vacuo* and the product was sublimed from the crude *in vacuo* at 313 K.

Yield: 0.22 g / 15%.

$\delta^1\text{H}$  (400.13 MHz,  $\text{C}_6\text{D}_6$ ) = 1.70 (s, 6 H,  $\text{CH}_3$ );

$\delta^{13}\text{C}\{^1\text{H}\}$  (100.62 MHz,  $\text{C}_6\text{D}_6$ ) = 43.7 ( $\text{CH}_3$ );

$\delta^{11}\text{B}$  (128.38 MHz,  $\text{C}_6\text{D}_6$ ) = -13.2 (m,  $\text{BD}_3$ ).

## SUPPORTING INFORMATION

**Synthesis of magnesium complex 5:**

The thf derivative of this compound had been described before.<sup>10</sup> Complex **5** was synthesized by following the corresponding procedure, but using toluene/dme 10:1 as solvent.

$\delta^1\text{H}$  (400.13 MHz,  $\text{C}_6\text{D}_6$ ) = 1.35 - 2.01 (m, 20 H,  $\text{BH}$ ), 2.17 (s, 24 H,  $\text{N-CH}_3$ ), 2.21 (s, 24 H,  $\text{N-CH}_3$ ), 3.15 (s, 6 H,  $\text{O-CH}_3$ ), 3.36 (s, 4 H,  $\text{O-CH}_2$ );

$\delta^{13}\text{C}\{^1\text{H}\}$  (100.62 MHz,  $\text{C}_6\text{D}_6$ ) = 52.0 ( $\text{C-CH}_3$ ), 59.6 (dme- $\text{C-CH}_3$ ), 72.0 (dme- $\text{C-CH}_2$ );

$\delta^{11}\text{B}$  (128.38 MHz,  $\text{C}_6\text{D}_6$ ) = -16.6 (t,  $^1J_{\text{BH}} = 86$  Hz,  $\text{BH}_2$ ), 2.9 (q,  $^1J_{\text{BH}} = 106$  Hz,  $\text{BH}_3$ );

$\delta^{11}\text{B}$  (128.38 MHz, dme) = -15.4 (q,  $^1J_{\text{BH}} = 89$  Hz), 3.7 (t,  $^1J_{\text{BH}} = 102$  Hz).

Elemental analysis for  $\text{C}_{20}\text{H}_{78}\text{B}_8\text{Mg}_2\text{N}_8\text{O}_2$ : calculated: C: 40.17%, H: 13.15%, N: 18.74%; found: C: 40.10%, H: 12.81%, N: 18.59%.

**Catalytic dehydrocoupling:**

In a typical run, the reaction was performed in a glovebox using a 5 mL volume vial. Magnesocenophane **1a** (5 mol%: 8.0 mg, 0.04 mmol) was added to a solution of the corresponding amine borane (**2a**: 50 mg, 0.85 mmol; **2b**: 95 mg, 0.83 mmol; **2c**: 37 mg, 0.82 mmol) in 1 mL dme and the mixture was stirred at ambient conditions for a given amount of time.

For NMR measurements, a sample of approximately 0.3 mL was added to a NMR tube, diluted with approximately 0.3 mL of  $\text{C}_6\text{D}_6$ , and analyzed by  $^{11}\text{B}$  NMR spectroscopy.

For discontinuous monitoring of the reaction, the reaction was performed at approximately three times the scale, and aliquots were taken at the corresponding points in time and analyzed by  $^{11}\text{B}$  NMR spectroscopy.

The following signals were observed for the different species in dme:  $\delta^{11}\text{B}$  (128 MHz, dme) = -21.0 (**2b** ( $i\text{Pr}_2\text{NH}\cdot\text{BH}_3$ ), q,  $^1J_{\text{BH}} = 98.0$  Hz); -18.0 (**2c** ( $\text{MeNH}_2\cdot\text{BH}_3$ ), q,  $^1J_{\text{BH}} = 96.0$  Hz); -13.3 (**2a** ( $\text{Me}_2\text{NH}\cdot\text{BH}_3$ ), q,  $^1J_{\text{BH}} = 98.0$  Hz); -5.3 ( $([\text{MeNHBH}_2]_3)$ , t,  $^1J_{\text{BH}} = 106$  Hz); 5.4 (**3a** ( $([\text{Me}_2\text{NBH}_2]_2)$ , t,  $^1J_{\text{BH}} = 114$  Hz); 28.8 ( $([\text{Me}_2\text{N}]_2\text{BH})$ , d,  $^1J_{\text{BH}} = 132$  Hz); 35.1 (**4b** ( $i\text{Pr}_2\text{N}=\text{BH}_2$ ), t,  $^1J_{\text{BH}} = 127$  Hz); 37.7 (**4a** ( $\text{Me}_2\text{N}=\text{BH}$ )<sub>2</sub>, t,  $^1J_{\text{BH}} = 128$  Hz).

## SUPPORTING INFORMATION

## Reaction Monitoring

For continuous monitoring of the reaction at elevated temperatures by  $^{11}\text{B}$  NMR spectroscopy, dme solutions of **2a** and 5 mol% of **1a** were charged into NMR tubes and analyzed by *in-situ*  $^{11}\text{B}$  NMR spectroscopy at 323 K and 333 K (spectrometer temperature), with  $^{11}\text{B}$  NMR spectra being recorded at regular intervals of 3 min. In all cases, conversions were determined by integration of **2a** vs **3a**. In some cases, a slight deviation from a linear fit for  $\ln c/T$  is observed for the first few data points. This might arise from the sample warming up in the preheated spectrometer.

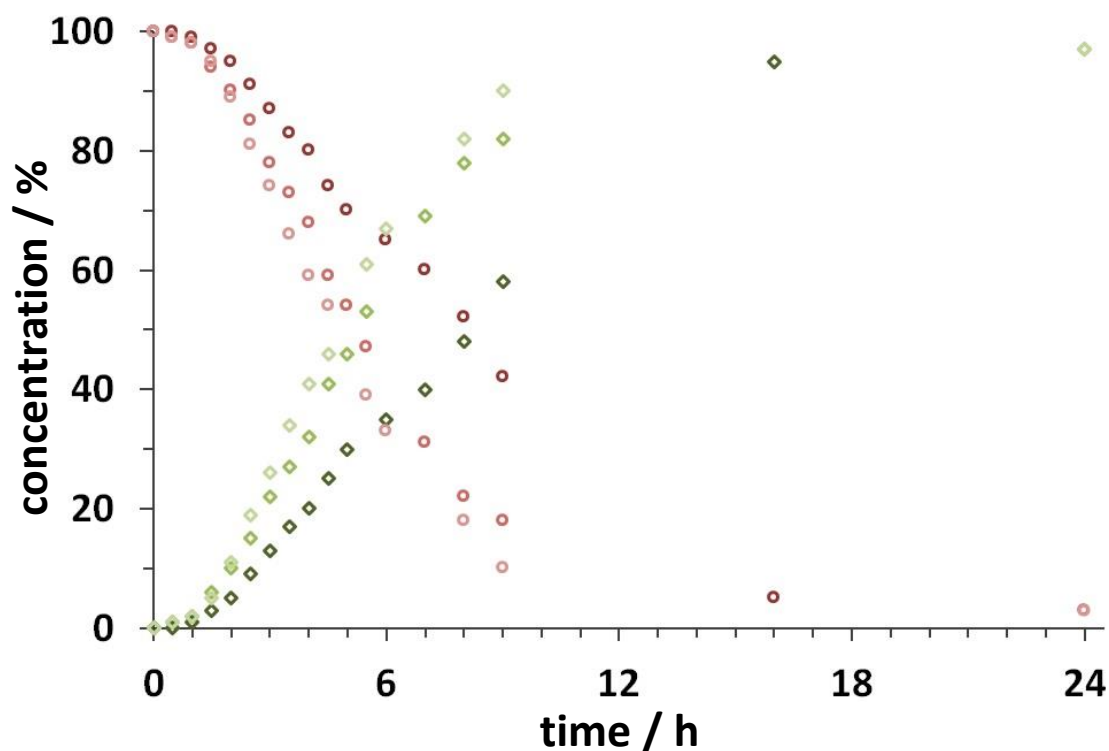

**Figure S1.** Relative concentration of **2a** (○) ( $c_0 = 850$  mM) and **3a** (◇) vs time, for reactions catalyzed by 5 mol% (■), 7.5 mol% (■) and 10 mol% (■) of **1a** in dme at r.t., as determined by discontinuous  $^{11}\text{B}$  NMR measurements.

## SUPPORTING INFORMATION

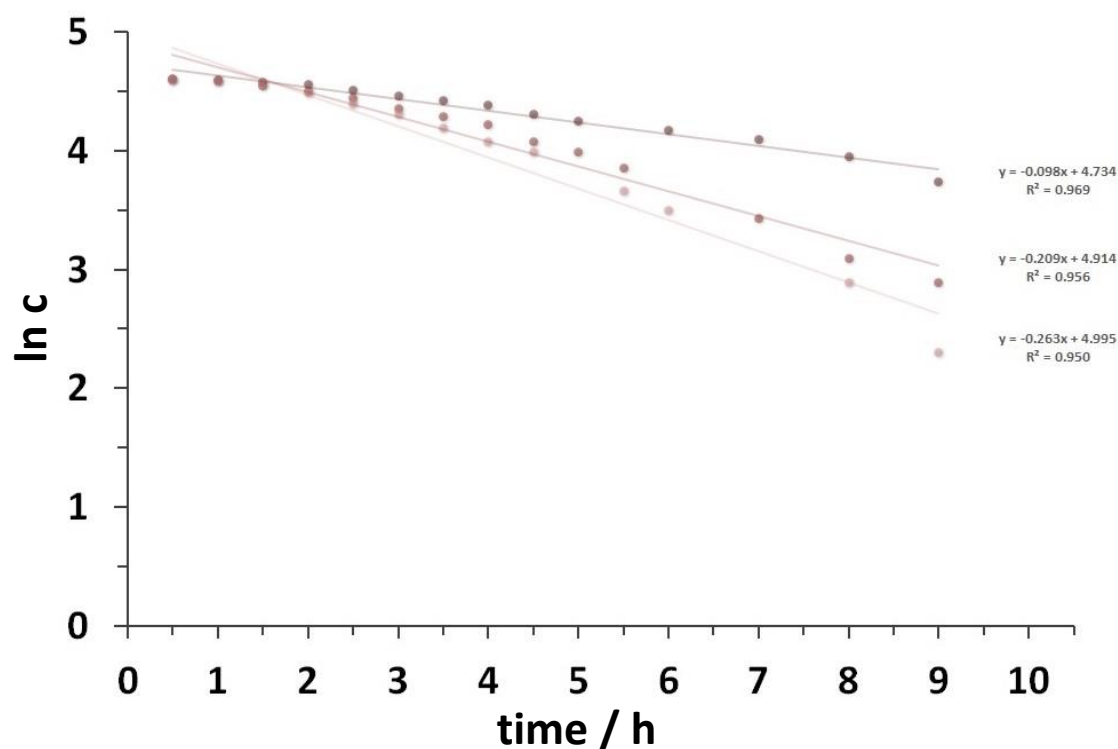

**Figure S2.** Plots of  $\ln[2a]$  (for relative concentrations in %,  $c_0 = 850$  mM) vs time, for reactions catalyzed by 5 mol% (■), 7.5 mol% (■) and 10 mol% (■) of **1a** in dme at r. t., as determined by discontinuous  $^{11}\text{B}$  NMR measurements.

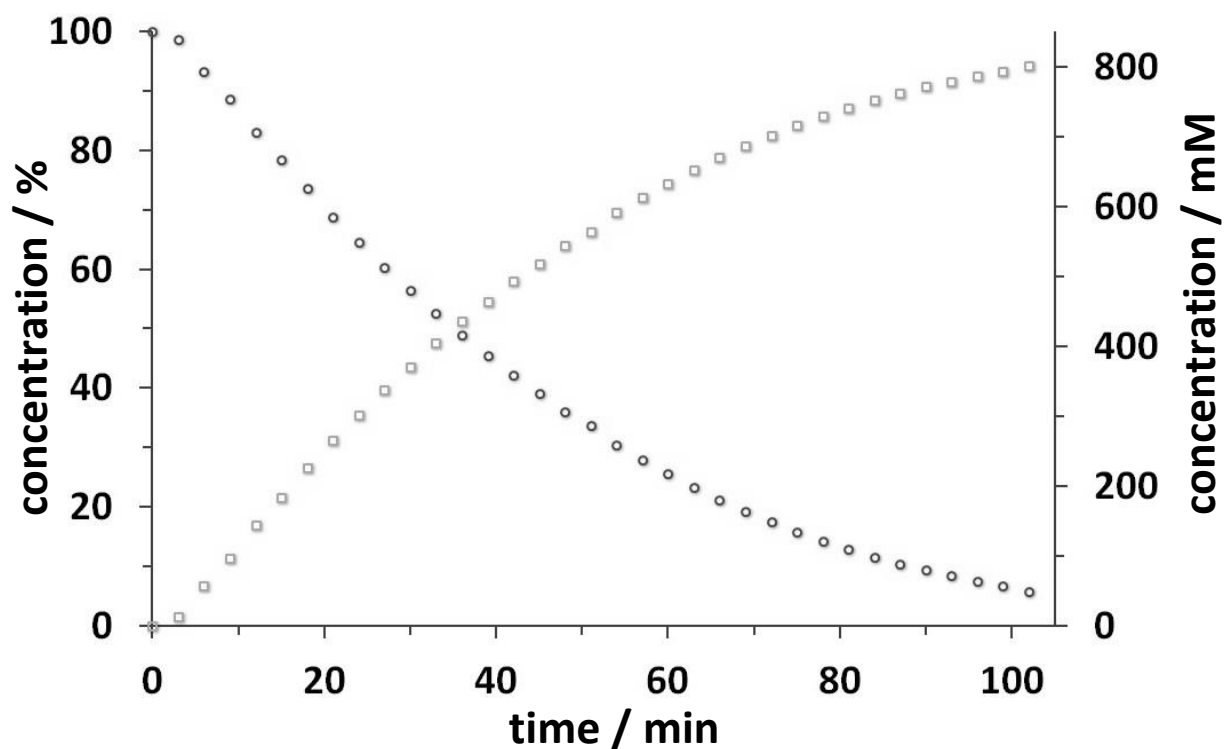

**Figure S3.** Plot of concentration of **2a** (○) ( $c_0 = 850$  mM) and **3a** (□) vs time, for reactions catalyzed by 5 mol% of **1a** in dme at 333 K, as determined by *in-situ*  $^{11}\text{B}$  NMR measurements.

## SUPPORTING INFORMATION

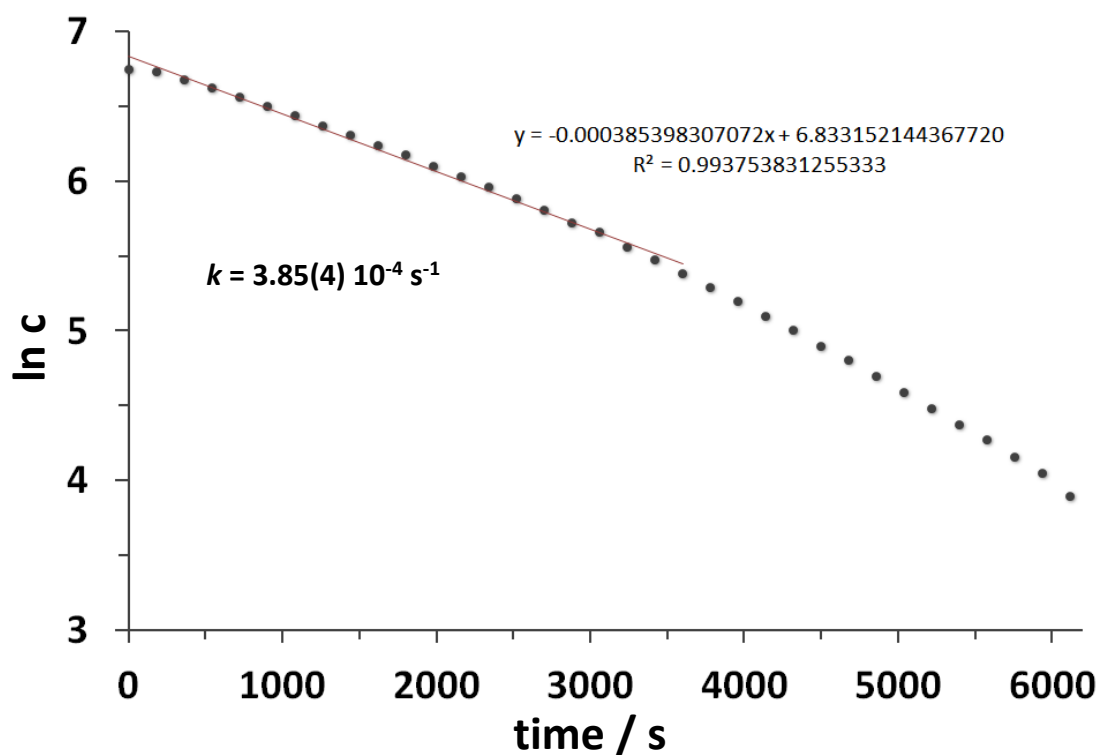

**Figure S4.** Plot of  $\ln[2a]$  (for concentrations in  $\text{mmol L}^{-1}$  estimated from the known starting concentrations of  $c_0 = 850 \text{ mM}$  for **2a**) vs time, for reactions catalyzed by 5 mol% of **1a** in dme at 333 K, as determined by *in-situ*  $^{11}\text{B}$  NMR measurements. Rate constant  $k(\mathbf{2a})$  was determined by a linear fitting for 0 - 60 min (error of the rate constant was estimated from  $R^2$ ).

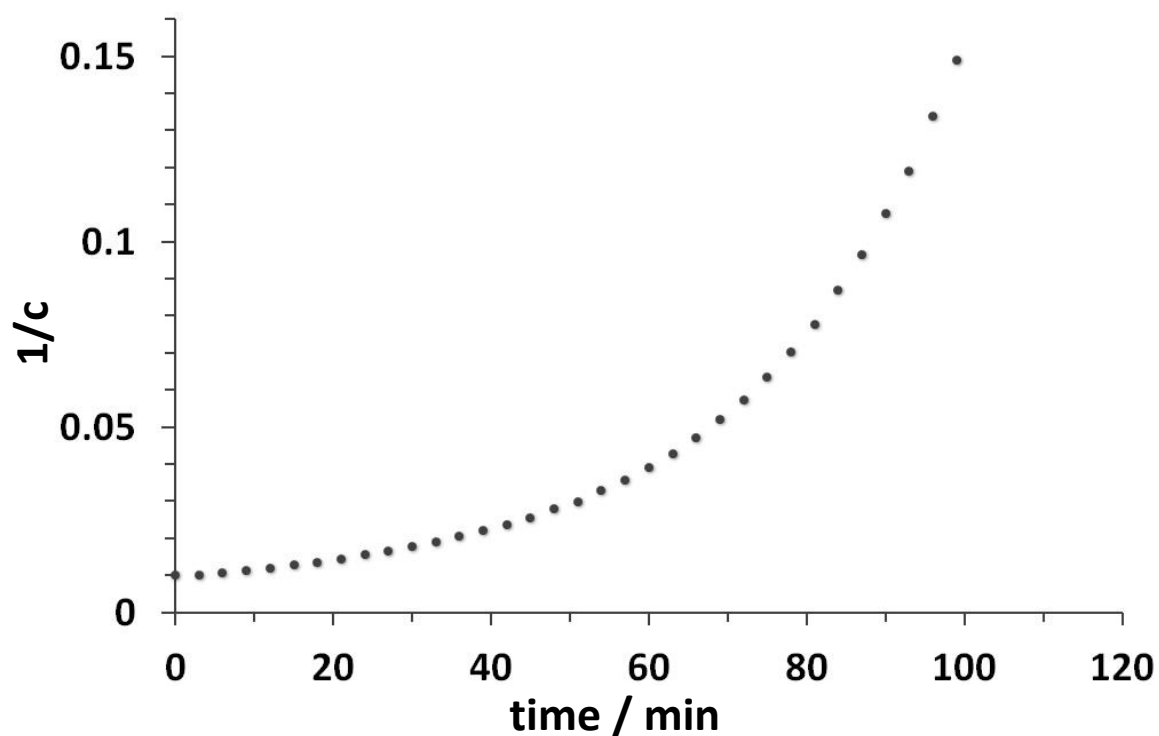

**Figure S5.** Plot of  $1/[2a]$  (for relative concentrations in %,  $c_0 = 850 \text{ mM}$ ) vs time, for reactions catalyzed by 5 mol% of **1a** in dme at 333 K, as determined by *in-situ*  $^{11}\text{B}$  NMR measurements.

## SUPPORTING INFORMATION

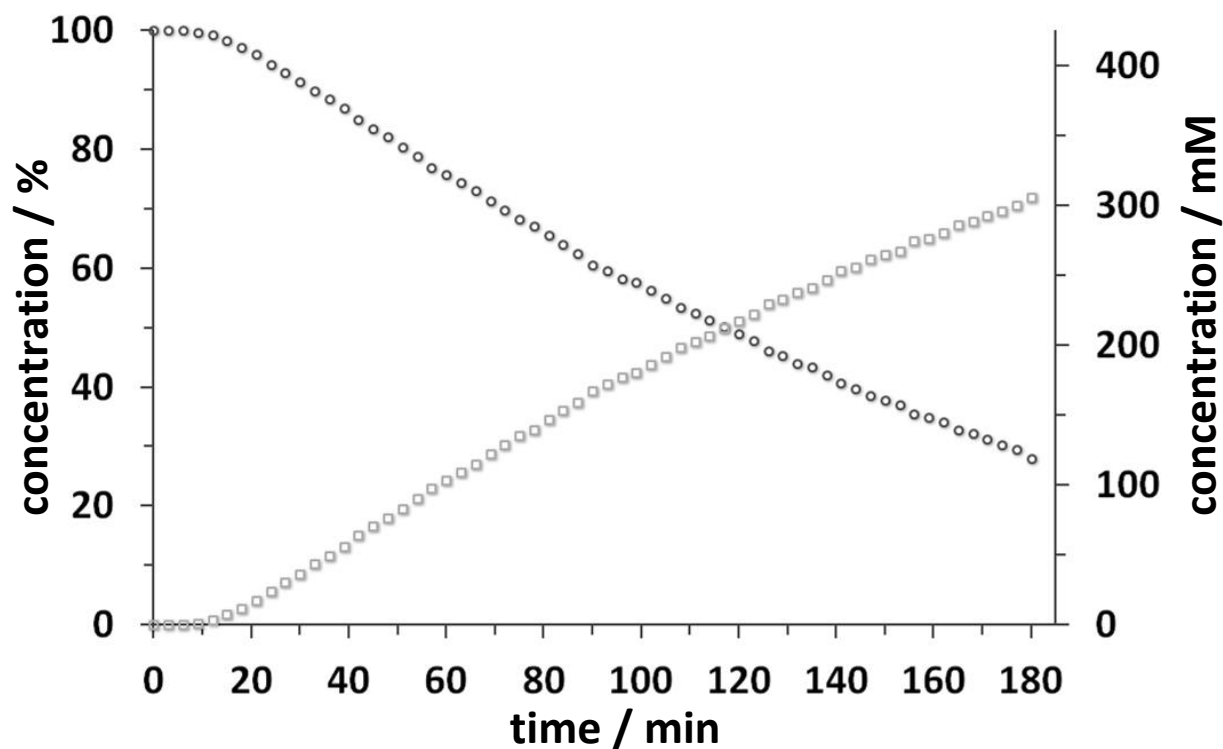

**Figure S6.** Plot of concentration of **2a** (O) ( $c_0 = 425$  mM) and **3a** (□) vs time, for reactions catalyzed by 5 mol% of **1a** in dme at 323 K, as determined by *in-situ*  $^{11}\text{B}$  NMR measurements.

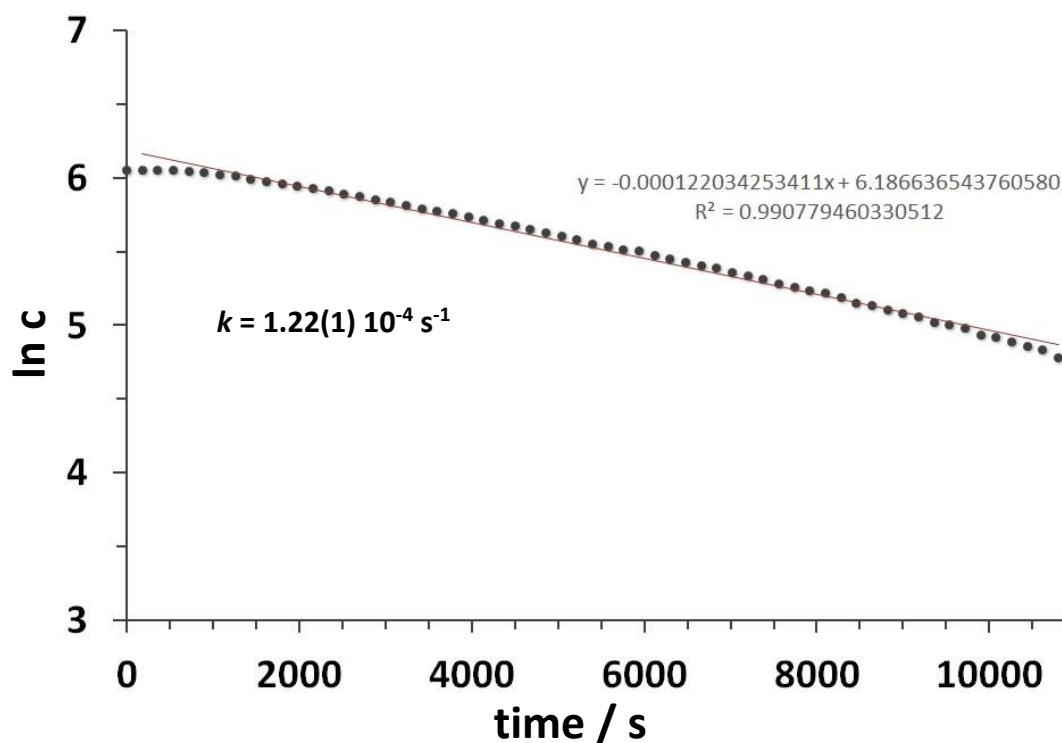

**Figure S7.** Plot of  $\ln[2a]$  (for concentrations in  $\text{mmol L}^{-1}$  estimated from the known starting concentrations of  $c_0 = 425$  mM for **2a**) vs time, for reactions catalyzed by 5 mol% of **1a** in dme at 323 K, as determined by *in-situ*  $^{11}\text{B}$  NMR measurements. Rate constant  $k(2a)$  was determined by a linear fitting for 3-180 min (error of the rate constant was estimated from  $R^2$ ).



## SUPPORTING INFORMATION

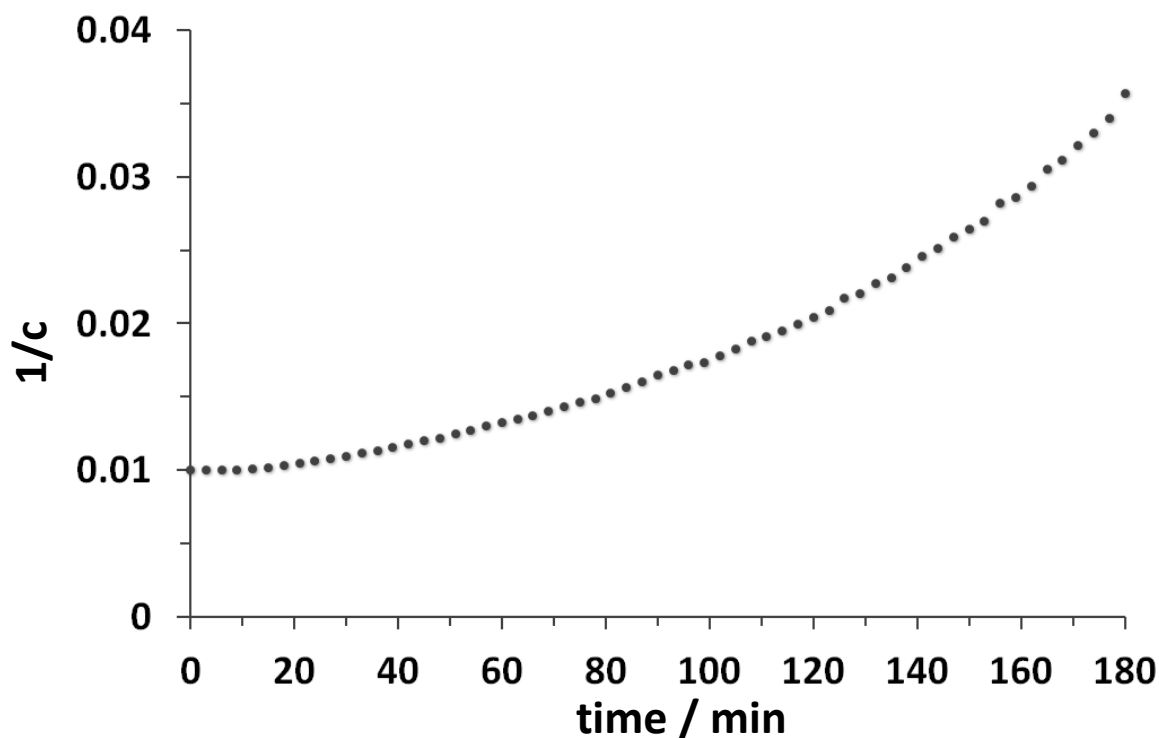

**Figure S8.** Plot of  $1/[2a]$  (for relative concentrations in %,  $c_0 = 425$  mM) vs time, for reactions catalyzed by 5 mol% of **1a** in dme at 323 K, as determined by *in-situ*  $^{11}\text{B}$  NMR measurements.

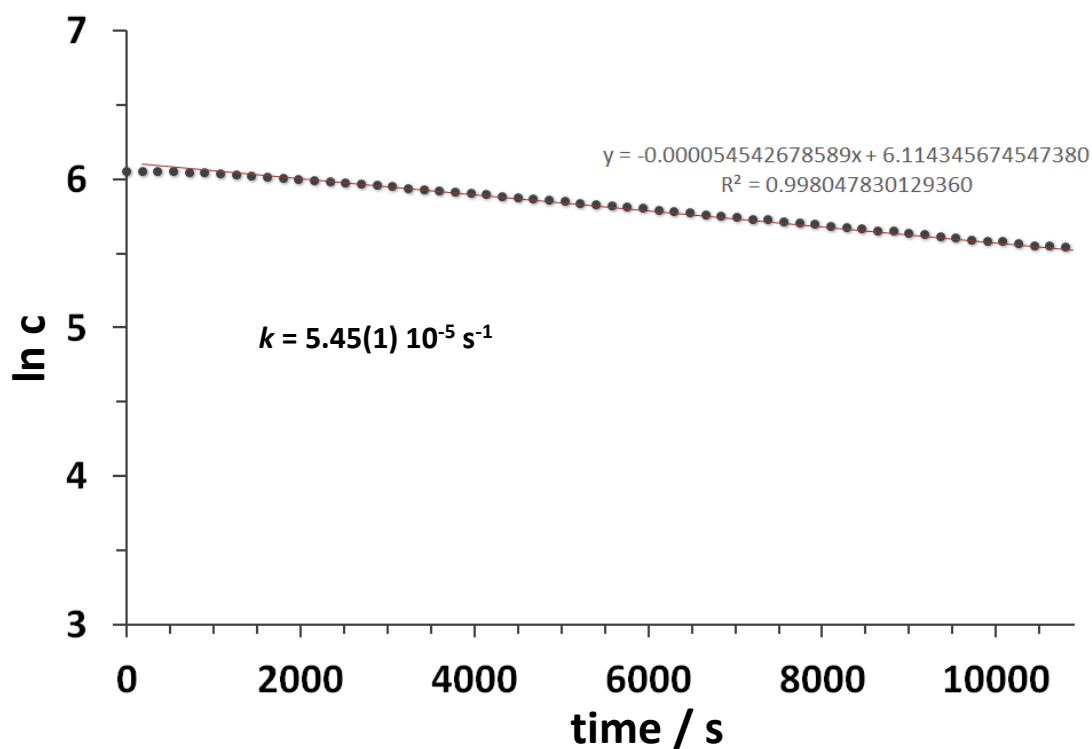

**Figure S9.** Plot of  $\ln[2aND]$  (for concentrations in  $\text{mmol L}^{-1}$  estimated from the known starting concentrations of  $c_0 = 425$  mM for **2aND**) vs time, for reactions catalyzed by 5 mol% of **1a** in dme at 323 K, as determined by *in-situ*  $^{11}\text{B}$  NMR measurements. Rate constant  $k(2aND)$  was determined by a linear fitting for 3-309 min (error of the rate constant was estimated from  $R^2$ ).

## SUPPORTING INFORMATION

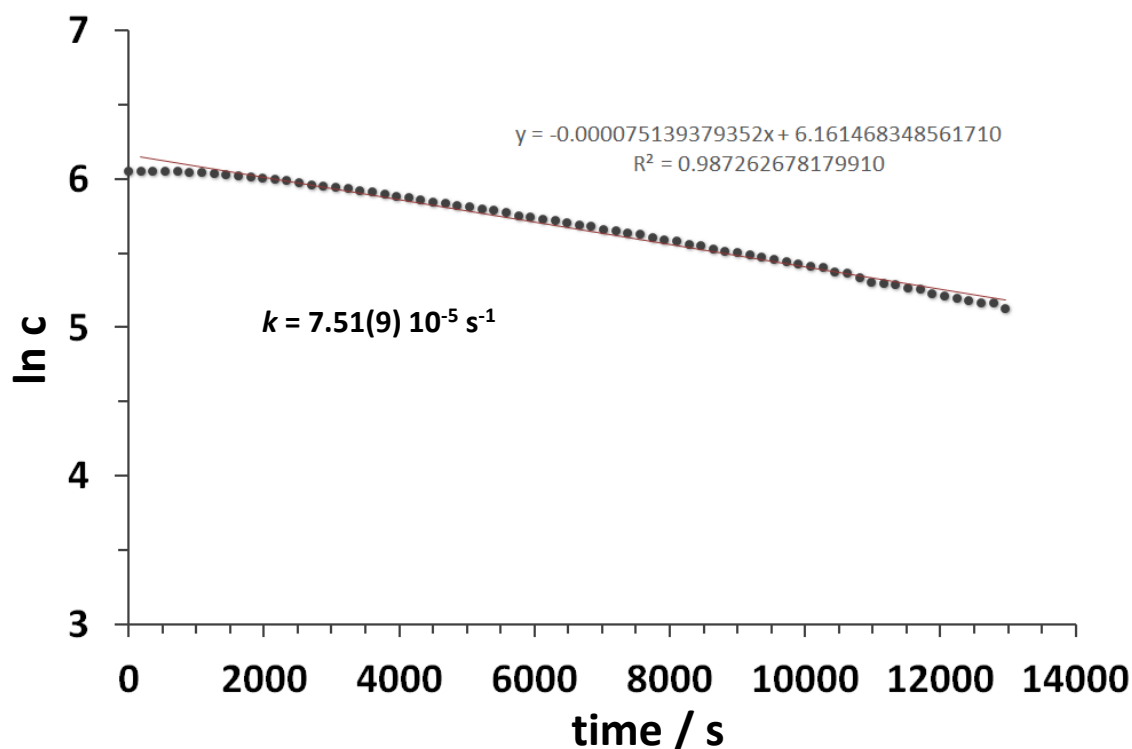

**Figure S10.** Plot of  $\ln[2\mathbf{aBD}]$  (for concentrations in  $\text{mmol L}^{-1}$  estimated from the known starting concentrations of  $c_0 = 425 \text{ mM}$  for **2aBD**) vs time, for reactions catalyzed by 5 mol% of **1a** in dme at 323 K, as determined by *in-situ*  $^{11}\text{B}$  NMR measurements. Rate constant  $k(2\mathbf{aBD})$  was determined by a linear fitting for 3-216 min (error of the rate constant was estimated from  $R^2$ ).

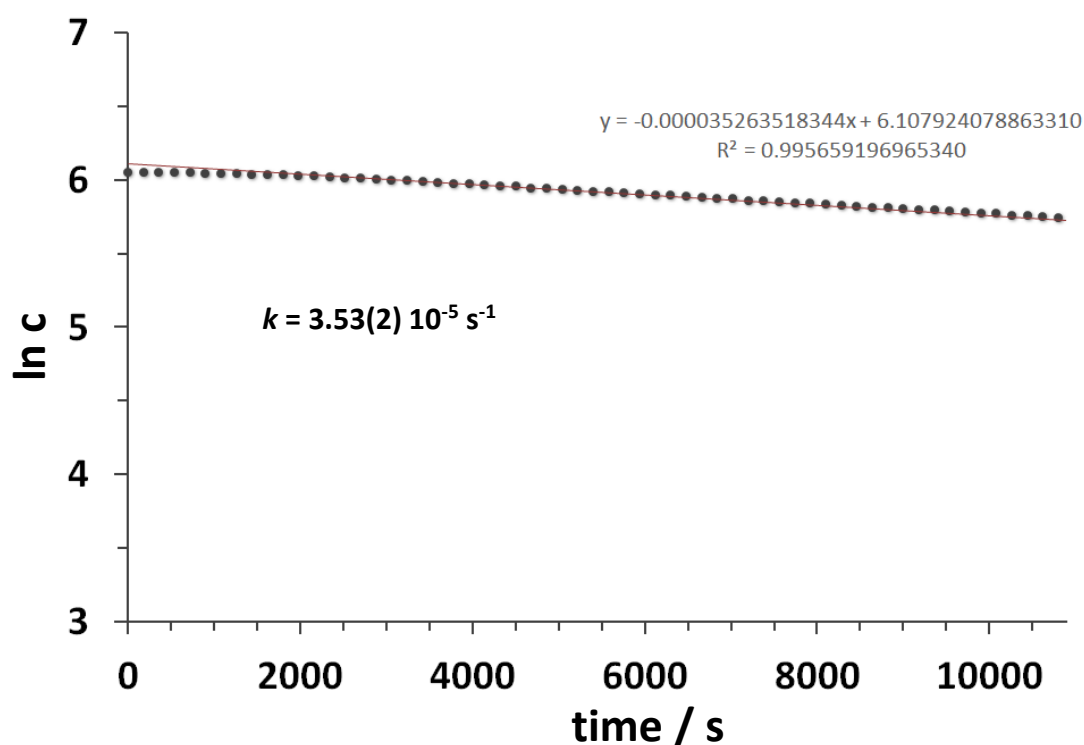

**Figure S11.** Plot of  $\ln[2\mathbf{aNDBD}]$  (for concentrations in  $\text{mmol L}^{-1}$  estimated from the known starting concentrations of  $c_0 = 425 \text{ mM}$  for **2aBD**) vs time, for reactions catalyzed by 5 mol% of **1a** in dme at 323 K, as determined by *in-situ*  $^{11}\text{B}$  NMR measurements. Rate constant  $k(2\mathbf{aBD})$  was determined by a linear fitting for 3-360 min (error of the rate constant was estimated from  $R^2$ ).

## SUPPORTING INFORMATION

## NMR spectra

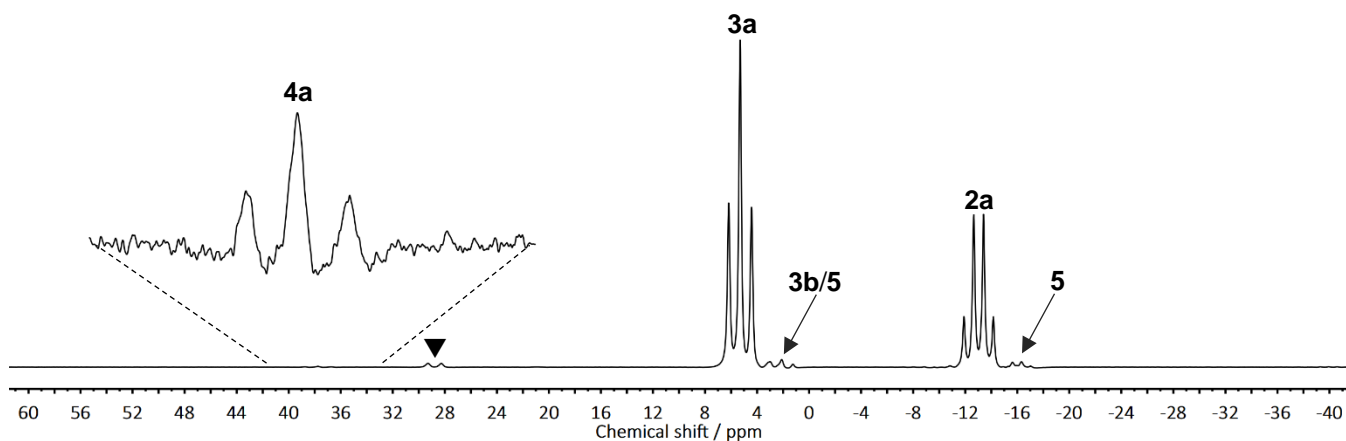

**Figure S12.**  $^{11}\text{B}$  NMR spectrum (128.38 MHz, 293 K,  $\text{C}_6\text{D}_6/\text{dme}$ ) of the reaction mixture of **2a** with 3 mol% of **1a** at r.t. after 24 h (▼ $[\text{Me}_2\text{N}]_2\text{BH}$ ).

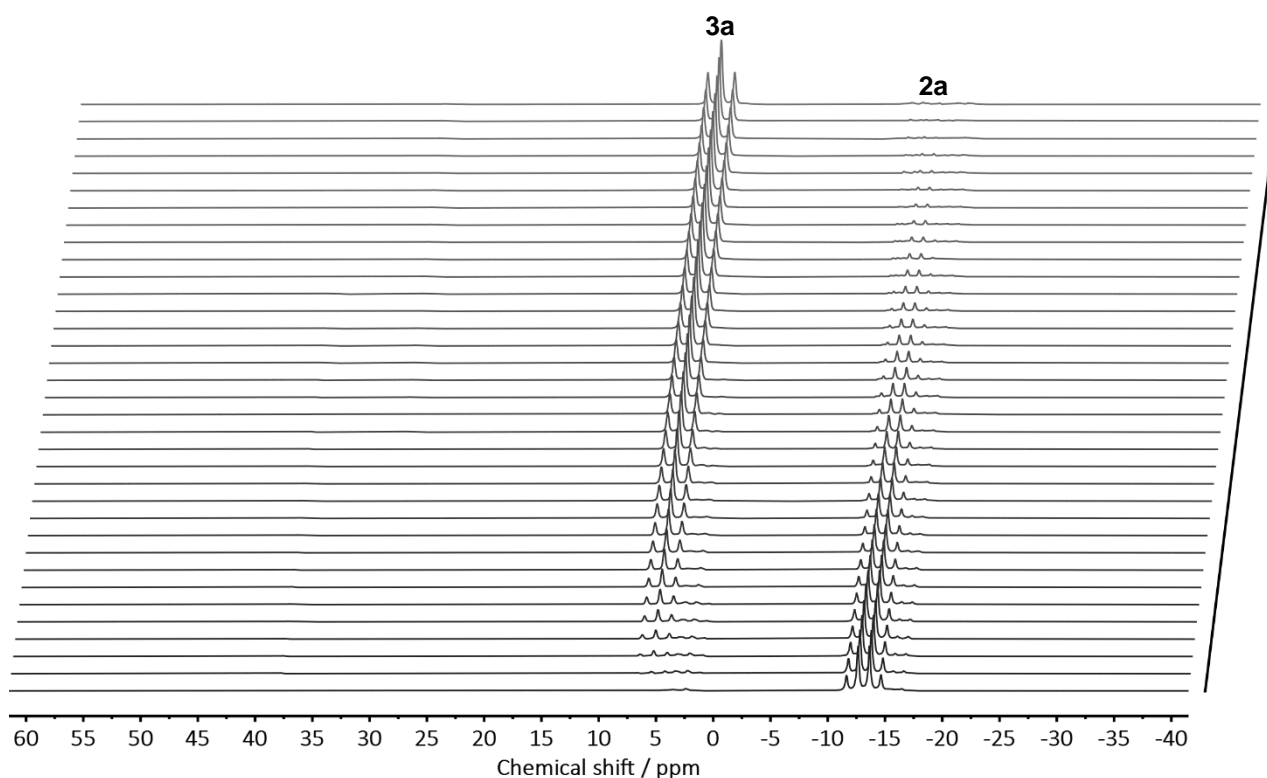

**Figure S13.**  $^{11}\text{B}$  NMR spectra (96.29 MHz, 333 K,  $\text{dme}$ ) of *in-situ* NMR monitoring of the reaction mixture of **2a** with 5 mol% of **1a** at 333 K in interval of 3 min (▼ $[\text{Me}_2\text{N}]_2\text{BH}$ ).

## SUPPORTING INFORMATION

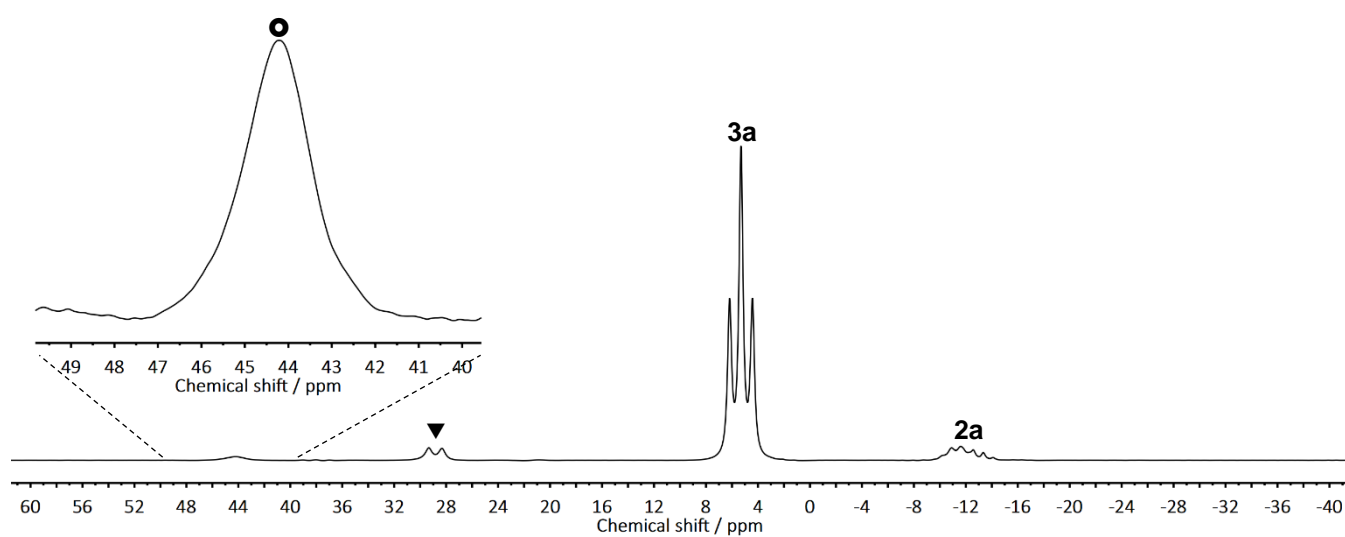

**Figure S14.**  $^{11}\text{B}$  NMR spectrum (128.38 MHz, 293 K,  $\text{C}_6\text{D}_6/\text{thf}$ ) of the reaction mixture of **2a** with 5 mol% of **1a** at r.t. after 24 h in the presence of cyclohexene (● $\text{Me}_2\text{N}=\text{BCy}_2$ ; ▼ $[\text{Me}_2\text{N}]_2\text{BH}$ ).

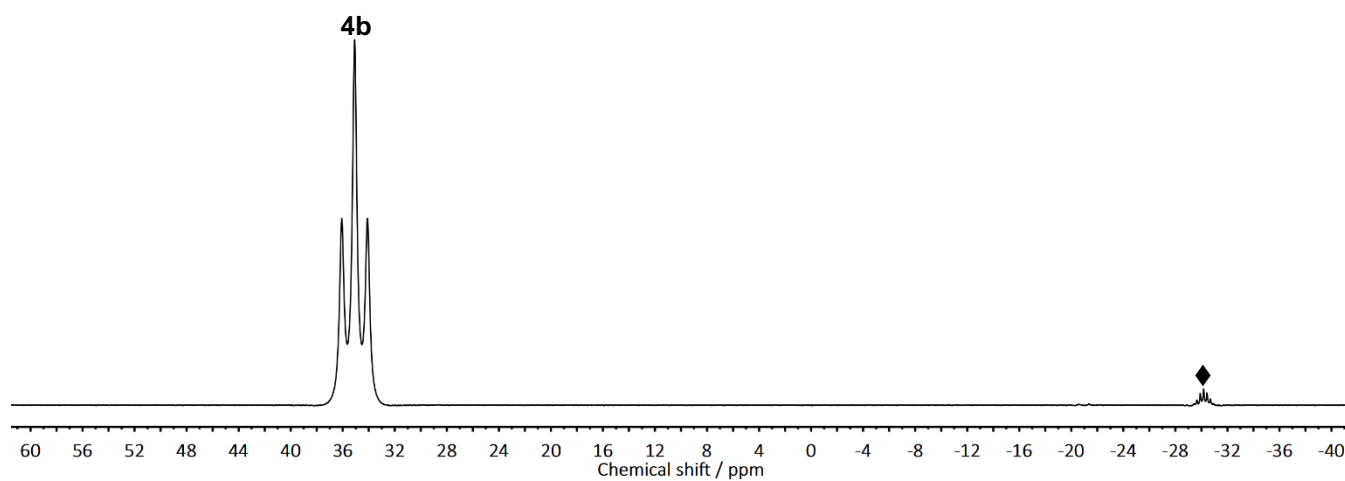

**Figure S15.**  $^{11}\text{B}$  NMR spectrum (128.38 MHz, 293 K,  $\text{C}_6\text{D}_6/\text{dme}$ ) of the reaction mixture of **2b** with 5 mol% of **1a** at r.t. after 24 h (◆ $\text{BH}_4^-$ ).

## SUPPORTING INFORMATION

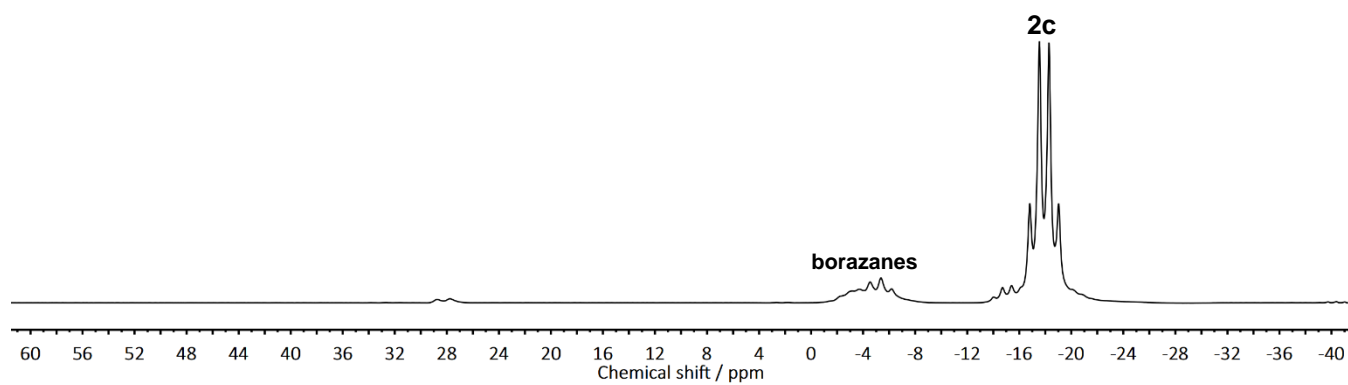

**Figure S16.**  $^{11}\text{B}$  NMR spectrum (128.38 MHz, 293 K,  $\text{C}_6\text{D}_6/\text{dme}$ ) of the reaction mixture of **2c** with 5 mol% of **1a** at r.t. after 24 h.

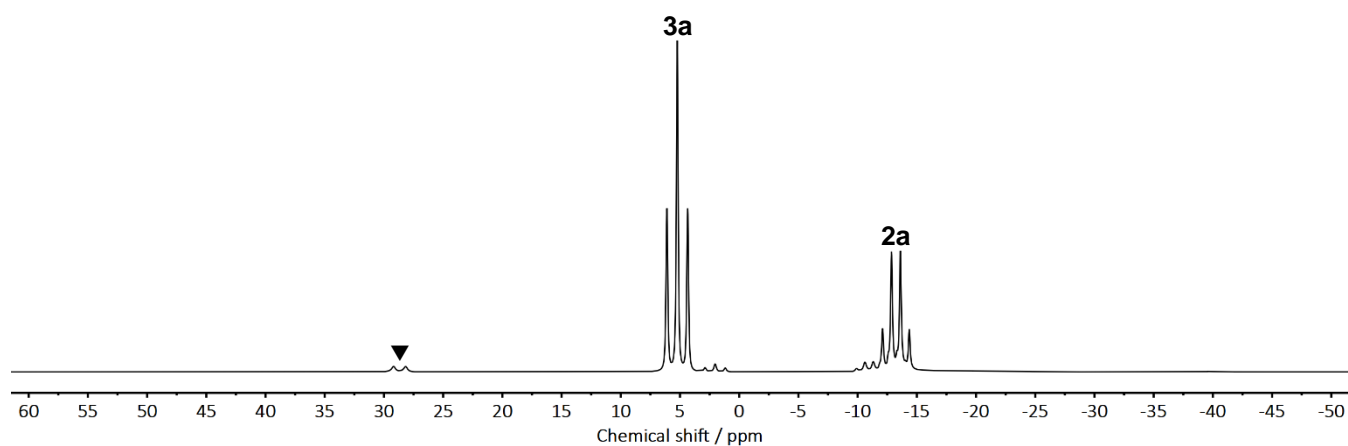

**Figure S17.**  $^{11}\text{B}$  NMR spectrum (128.38 MHz, 294 K,  $\text{C}_6\text{D}_6/\text{dme}$ ) of the reaction mixture of **3b** with 5 mol% of **1a** at r.t. after 16 h (▼ $[\text{Me}_2\text{N}]_2\text{BH}$ ).

## SUPPORTING INFORMATION

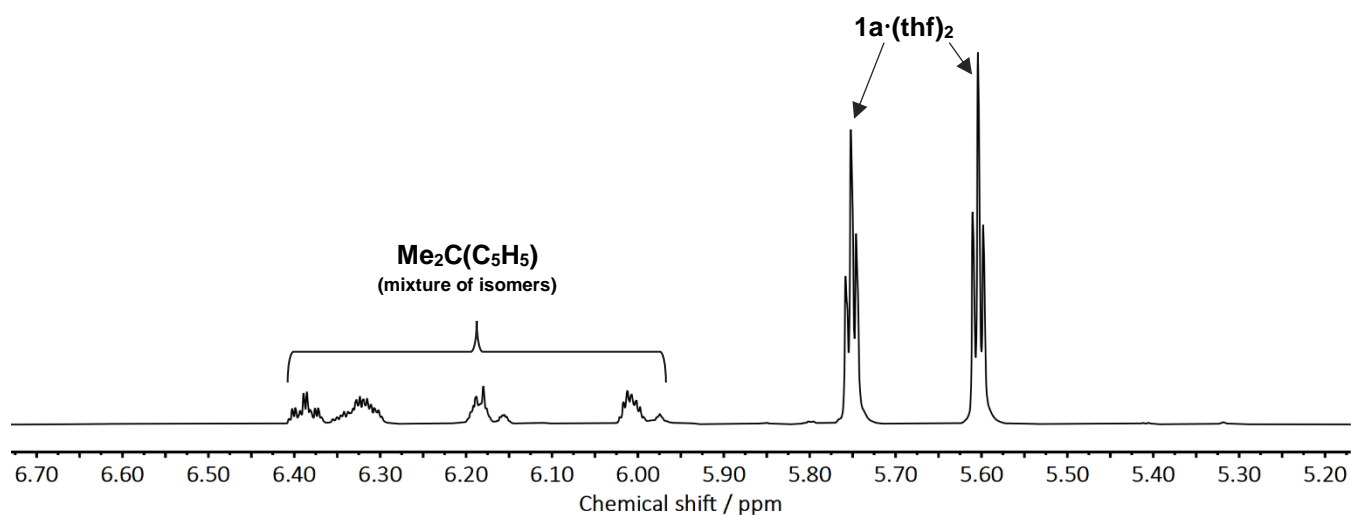

**Figure S18.** Part of the  $^1\text{H}$  NMR spectrum (400.13 MHz, 293 K, thf-D<sub>8</sub>) of the reaction mixture of 1 eq **1a** with 1 eq **2a** at r.t. after 48 h.

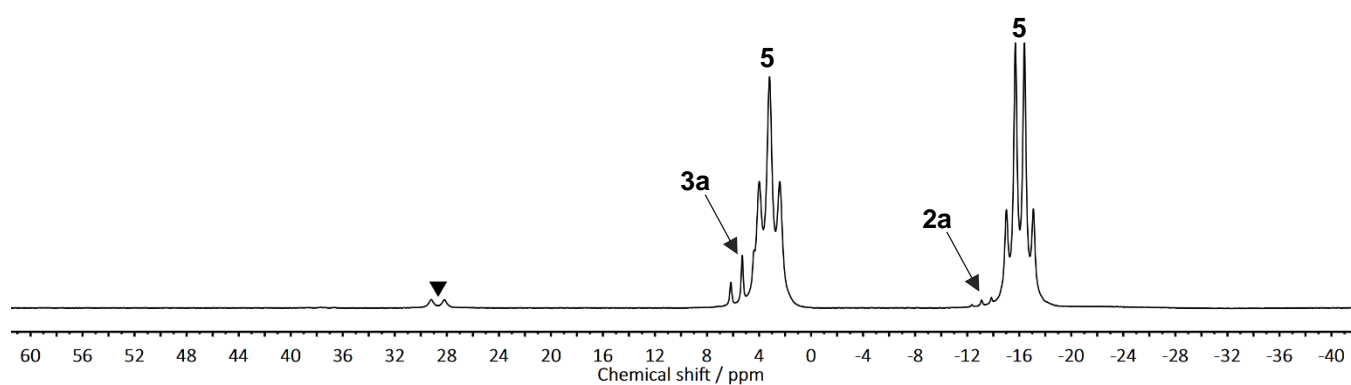

**Figure S19.**  $^{11}\text{B}$  NMR spectrum (128.38 MHz, 293 K, thf-D<sub>8</sub>) of the reaction mixture of 1 eq **1a** with 1 eq **2a** at r.t. after 48 h (▼[Me<sub>2</sub>N]<sub>2</sub>BH).

## SUPPORTING INFORMATION

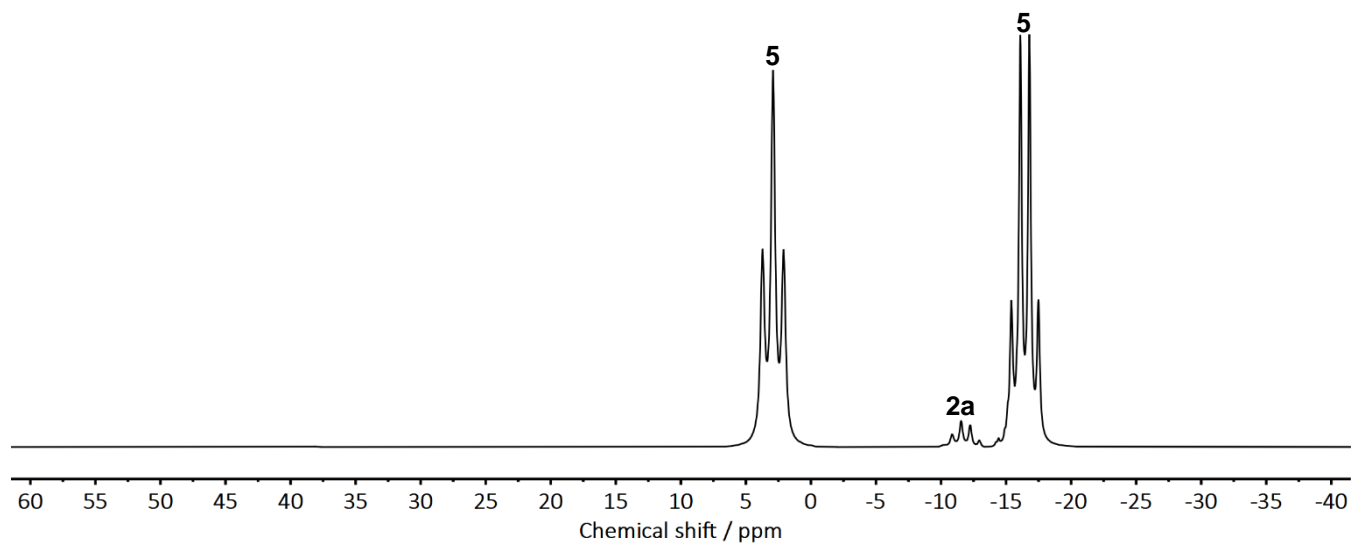

**Figure S20.**  $^{11}\text{B}$  NMR spectrum (128.38 MHz, 293 K,  $\text{C}_6\text{D}_6$ ) of magnesium complex **5**.

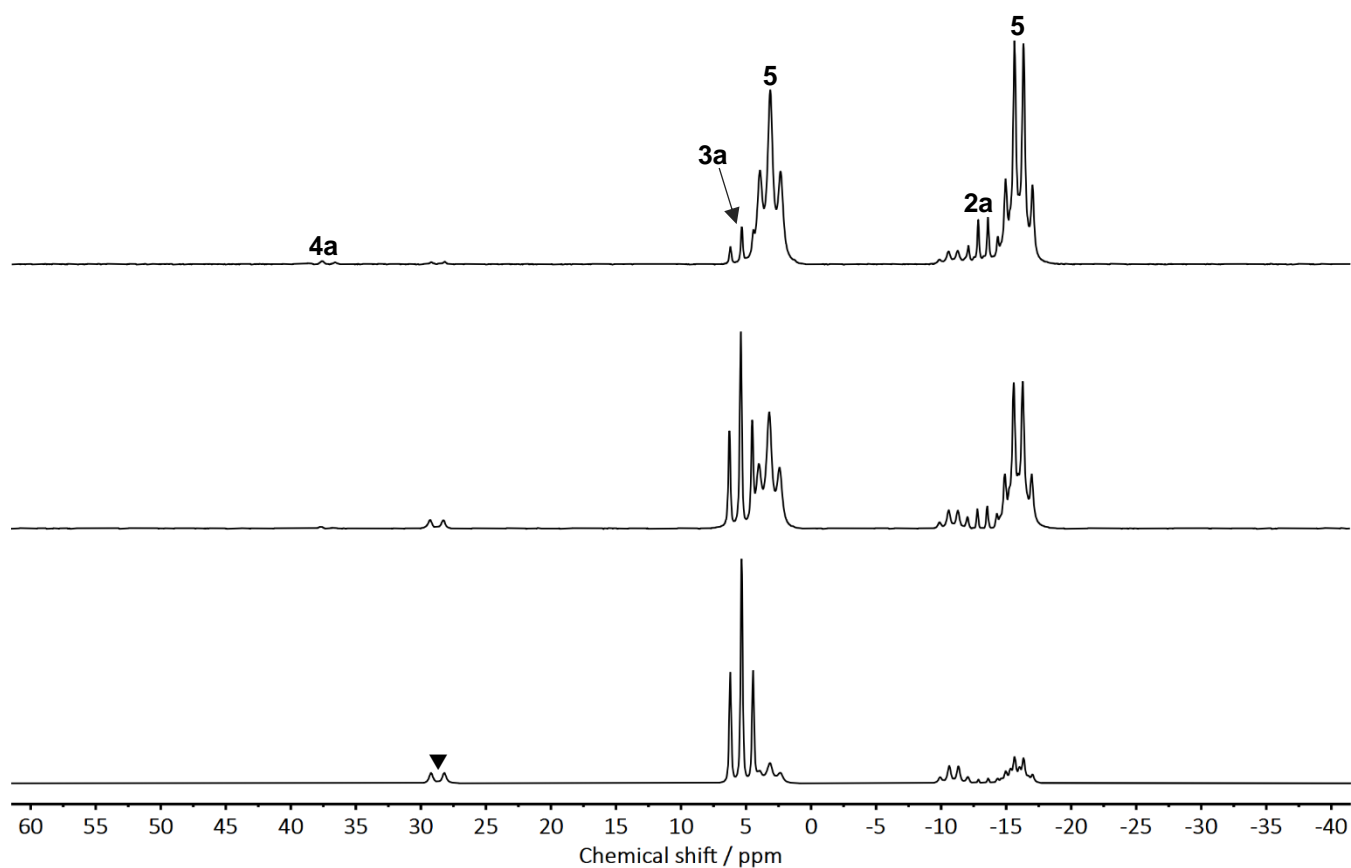

**Figure S21.**  $^{11}\text{B}$  NMR spectra (128.38 MHz, 293 K, dme) of a mixture of magnesium complex **5** and 2,2-dicyclopentadienylpropane at r.t. after 1 h (top), 24 h (center) and 96 h (bottom) (▼ $[\text{Me}_2\text{N}]_2\text{BH}$ ).

## SUPPORTING INFORMATION

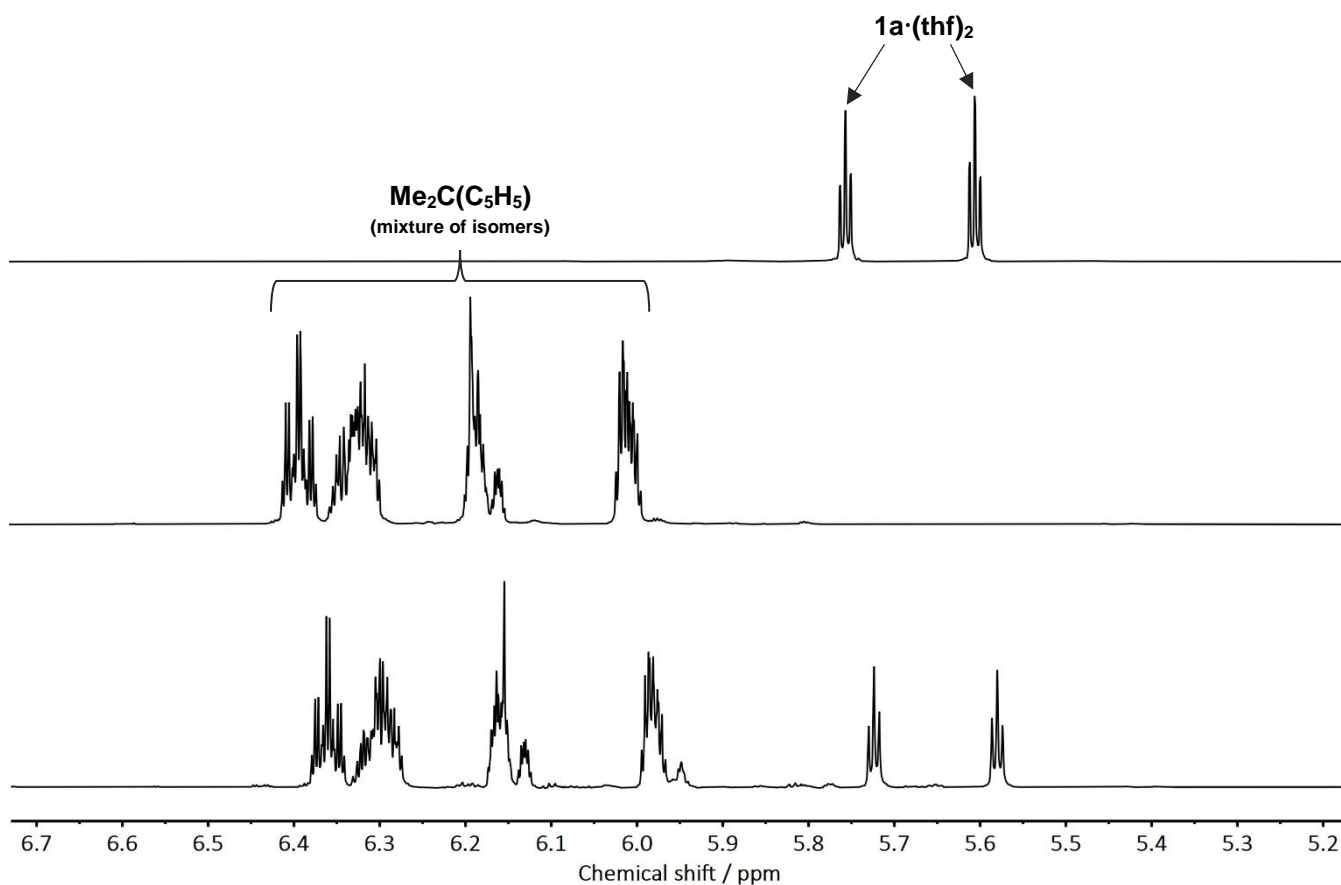

**Figure S22.** Part of the  $^1\text{H}$  NMR spectra (400.13 MHz, 294 K,  $\text{thf-D}_8$ ) of 2,2-dicyclopentadienylpropane (top),  $\text{C}[1]\text{magnescenophane}\cdot\text{bis}(\text{thf})$ ,  $\mathbf{1a}\cdot(\text{thf})_2$ , (center), and of a mixture of magnesium complex **5** and 2,2-dicyclopentadienylpropane (bottom) at r.t. after 2 h.

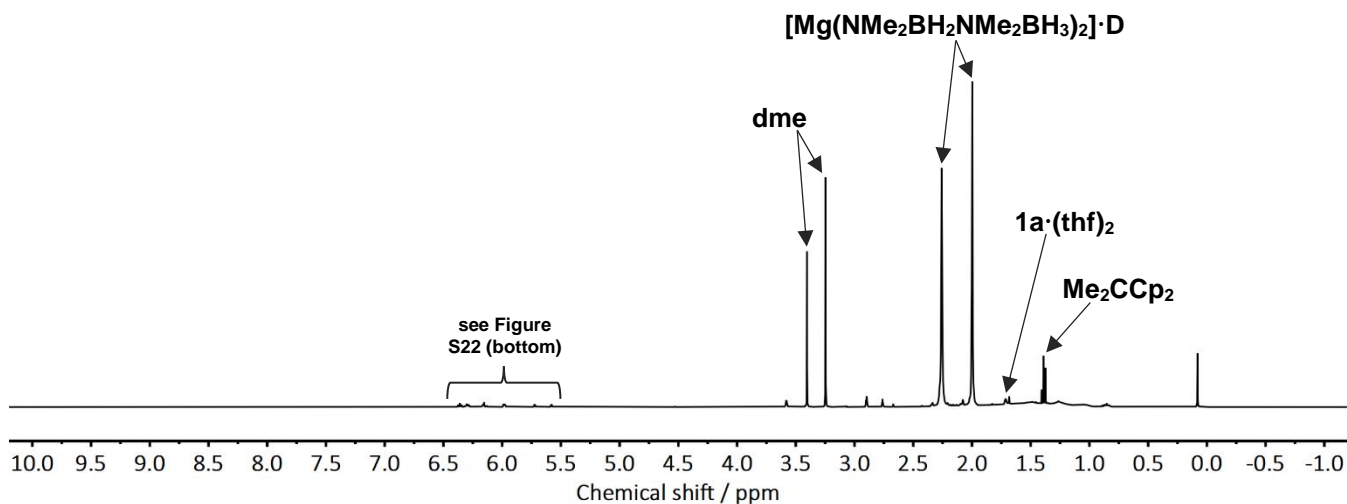

**Figure S23.**  $^1\text{H}$  NMR spectrum (400.13 MHz, 294 K,  $\text{thf-D}_8$ ) of a mixture of magnesium complex **5** and 2,2-dicyclopentadienylpropane at r.t. after 2 h.



## SUPPORTING INFORMATION

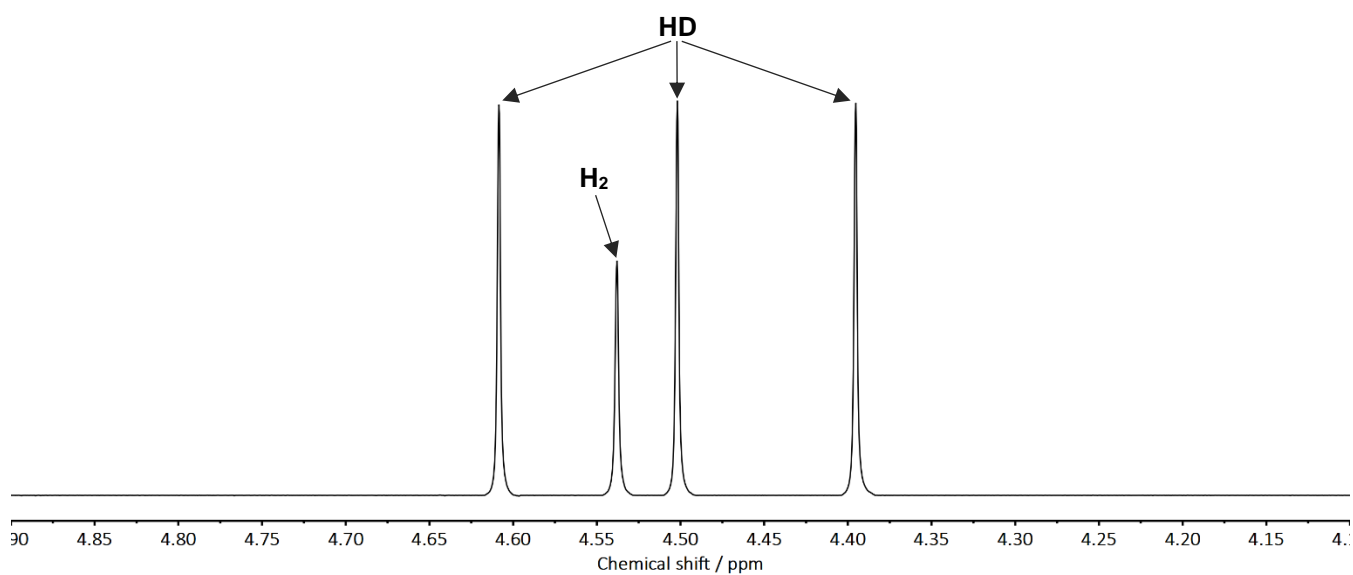

**Figure S24.** Part of the  $^1\text{H}$  NMR spectrum (400.13 MHz, 294 K, thf-D8) of the reaction mixture of **2a**NDBD with 10 mol% of **1a** at r.t. after 96 h.

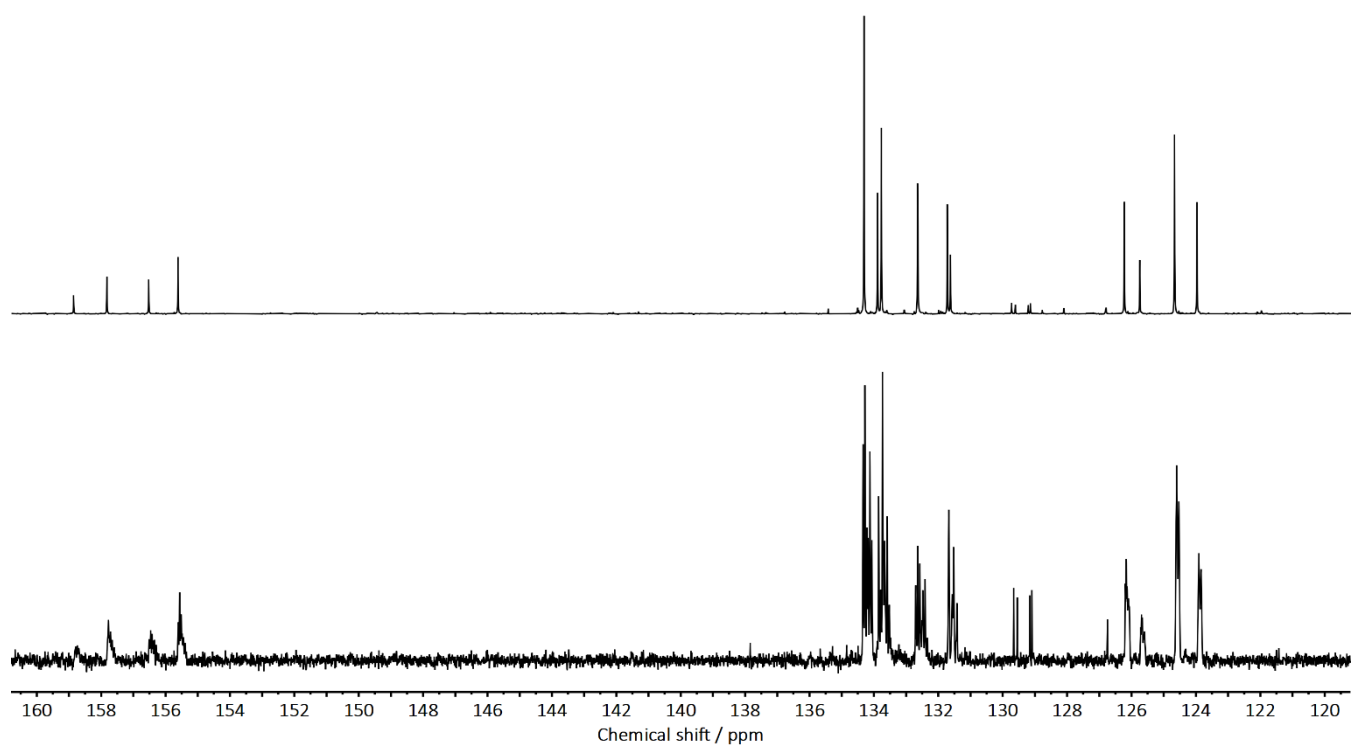

**Figure S25.** Part of the  $^{13}\text{C}$  NMR spectra (100.62 MHz, 293 K, thf-D8) of 2,2-dicyclopentadienylpropane (top), and of the reaction mixture of **2a**NDBD with 10 mol% of **1a** at r.t. after 96 h (bottom).

## SUPPORTING INFORMATION

## MS spectra

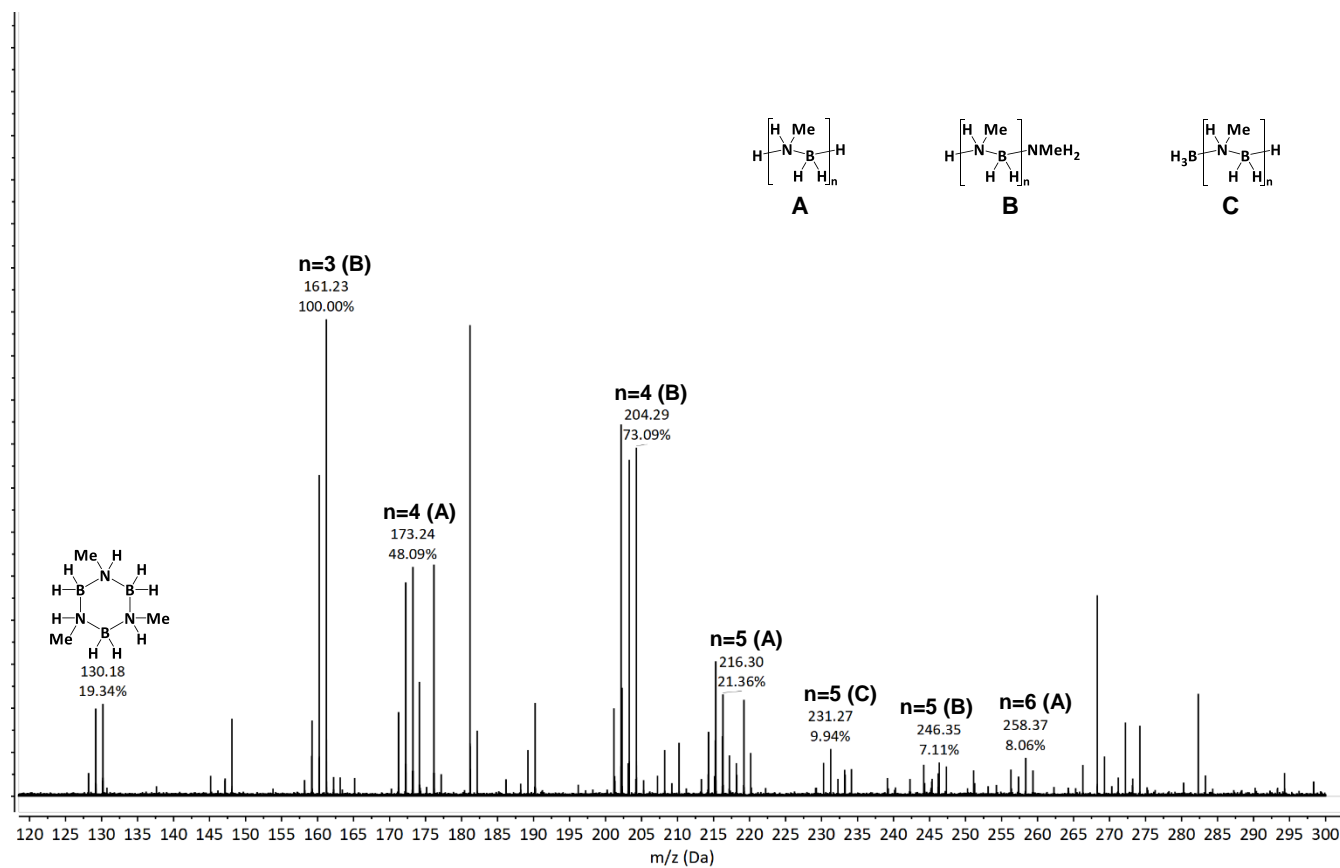

Figure S26. MS spectrum (ESI) of the reaction mixture of **2c** with 10 mol% of **1a** after 72 h

## SUPPORTING INFORMATION

## XRD data

Crystal structure data has been deposited with the Cambridge Crystallographic Data Centre (CCDC) and is available free of charge from the Cambridge Structural Database.

## crystal structure data of 1a·dme

(this compound was crystallized in two different modification)

|                                   |                                                                                                       |                                                                                                 |
|-----------------------------------|-------------------------------------------------------------------------------------------------------|-------------------------------------------------------------------------------------------------|
| CCDC code:                        | 1921397                                                                                               | 1971379                                                                                         |
| empirical formula                 | C <sub>17</sub> H <sub>24</sub> MgO <sub>2</sub>                                                      | C <sub>17</sub> H <sub>24</sub> MgO <sub>2</sub>                                                |
| formula weight                    | 284.67                                                                                                | 189.78                                                                                          |
| temperature                       | 212(2) K                                                                                              | 132(2) K                                                                                        |
| wavelength                        | 0.71073 Å                                                                                             | 0.71073 Å                                                                                       |
| crystal system                    | monoclinic                                                                                            | orthorhombic                                                                                    |
| space group                       | C2/c                                                                                                  | Pbca                                                                                            |
| unit cell dimensions              | a = 9.5539(9) Å      α = 90°<br>b = 13.3525(9) Å      β = 97.564(3)°<br>c = 12.4343(8) Å      γ = 90° | a = 14.3619(4) Å      α = 90°<br>b = 14.5325(5) Å      β = 90°<br>c = 15.0215(5) Å      γ = 90° |
| volume                            | 1572.4(2) Å <sup>3</sup>                                                                              | 3135.20(17) Å <sup>3</sup>                                                                      |
| Z                                 | 4                                                                                                     | 12                                                                                              |
| density (calculated)              | 1.202 mg m <sup>-3</sup>                                                                              | 1.206 Mg/m <sup>3</sup>                                                                         |
| absorption coefficient            | 0.112 mm <sup>-1</sup>                                                                                | 0.112 mm <sup>-1</sup>                                                                          |
| F(000)                            | 616                                                                                                   | 1232                                                                                            |
| crystal size                      | 0.273 x 0.184 x 0.174 mm <sup>3</sup>                                                                 | 0.382 x 0.376 x 0.344 mm <sup>3</sup>                                                           |
| theta range for data collection   | 2.637 to 32.665°                                                                                      | 2.411 to 30.396°                                                                                |
| index ranges                      | -11 ≤ h ≤ 14, -19 ≤ k ≤ 20, -18 ≤ l ≤ 18                                                              | -20 ≤ h ≤ 20, -15 ≤ k ≤ 20, -21 ≤ l ≤ 21                                                        |
| reflections collected             | 16705                                                                                                 | 31413                                                                                           |
| independent reflections           | 2888 [R(int) = 0.0358]                                                                                | 4684 [R(int) = 0.0236]                                                                          |
| completeness to theta = 25.242°   | 100.0%                                                                                                | 99.8%                                                                                           |
| absorption correction             | semi-empirical from equivalents                                                                       | semi-empirical from equivalents                                                                 |
| max. and min. transmission        | 0.7464 and 0.7216                                                                                     | 0.7460 and 0.7152                                                                               |
| refinement method                 | full-matrix least-squares on F <sup>2</sup>                                                           | full-matrix least-squares on F <sup>2</sup>                                                     |
| data / restraints / parameters    | 2888 / 0 / 140                                                                                        | 4684 / 0 / 185                                                                                  |
| goodness-of-fit on F <sup>2</sup> | 1.034                                                                                                 | 1.051                                                                                           |
| final R indices [I > 2σ(I)]       | R1 = 0.0532, wR2 = 0.1404                                                                             | R1 = 0.0346, wR2 = 0.0840                                                                       |
| R indices (all data)              | R1 = 0.0780, wR2 = 0.1602                                                                             | R1 = 0.0487, wR2 = 0.0915                                                                       |
| extinction coefficient            | n/a                                                                                                   | n/a                                                                                             |
| largest diff. peak and hole       | 0.238 and -0.551 e.Å <sup>-3</sup>                                                                    | 0.362 and -0.221 e.Å <sup>-3</sup>                                                              |

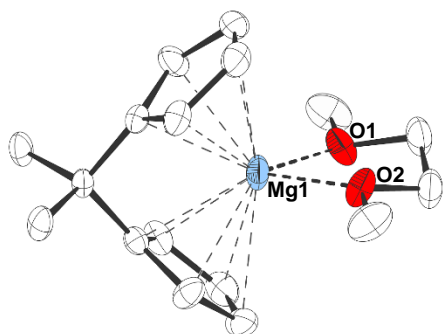

**Figure S27.** Molecular structure of 1a·dme in the crystal (thermal ellipsoids at 30% probability level; hydrogen atoms omitted for clarity; selected bond length and angles: Mg1-O1/O2: 205.3 pm, Mg1-Cp<sup>centroid</sup>: 230.4 pm, α = 80.1°).

## SUPPORTING INFORMATION

crystal structure data of **5**

|                                   |                                                                                                     |
|-----------------------------------|-----------------------------------------------------------------------------------------------------|
| CCDC code:                        | 1971378                                                                                             |
| empirical formula                 | C <sub>20</sub> H <sub>78</sub> B <sub>8</sub> Mg <sub>2</sub> N <sub>8</sub> O <sub>2</sub>        |
| formula weight                    | 598.00                                                                                              |
| temperature                       | 173(2) K                                                                                            |
| wavelength                        | 0.71073 Å                                                                                           |
| crystal system                    | monoclinic                                                                                          |
| space group                       | <i>P</i> 2 <sub>1</sub> / <i>c</i>                                                                  |
| unit cell dimensions              | a = 8.6472(4) Å      α = 90°<br>b = 9.4595(6) Å      β = 93.600(2)°<br>c = 23.9567(16) Å    γ = 90° |
| volume                            | 1955.7(2) Å <sup>3</sup>                                                                            |
| Z                                 | 2                                                                                                   |
| density (calculated)              | 1.015 mg m <sup>-3</sup>                                                                            |
| absorption coefficient            | 0.090 mm <sup>-1</sup>                                                                              |
| F(000)                            | 668                                                                                                 |
| crystal size                      | 0.318 x 0.201 x 0.138 mm <sup>3</sup>                                                               |
| theta range for data collection   | 2.315 to 33.271°                                                                                    |
| index ranges                      | -13 ≤ h ≤ 12, -11 ≤ k ≤ 14, -34 ≤ l ≤ 36                                                            |
| reflections collected             | 24493                                                                                               |
| independent reflections           | 7446 [R(int) = 0.0362]                                                                              |
| completeness to theta = 25.242°   | 99.9%                                                                                               |
| absorption correction             | semi-empirical from equivalents                                                                     |
| max. and min. transmission        | 0.7465 and 0.7035                                                                                   |
| refinement method                 | full-matrix least-squares on F <sup>2</sup>                                                         |
| data / restraints / parameters    | 7446 / 0 / 336                                                                                      |
| goodness-of-fit on F <sup>2</sup> | 1.027                                                                                               |
| final R indices [I > 2σ(I)]       | R1 = 0.0452, wR2 = 0.1026                                                                           |
| R indices (all data)              | R1 = 0.0701, wR2 = 0.1140                                                                           |
| extinction coefficient            | n/a                                                                                                 |
| largest diff. peak and hole       | 0.262 and -0.234 e.Å <sup>-3</sup>                                                                  |

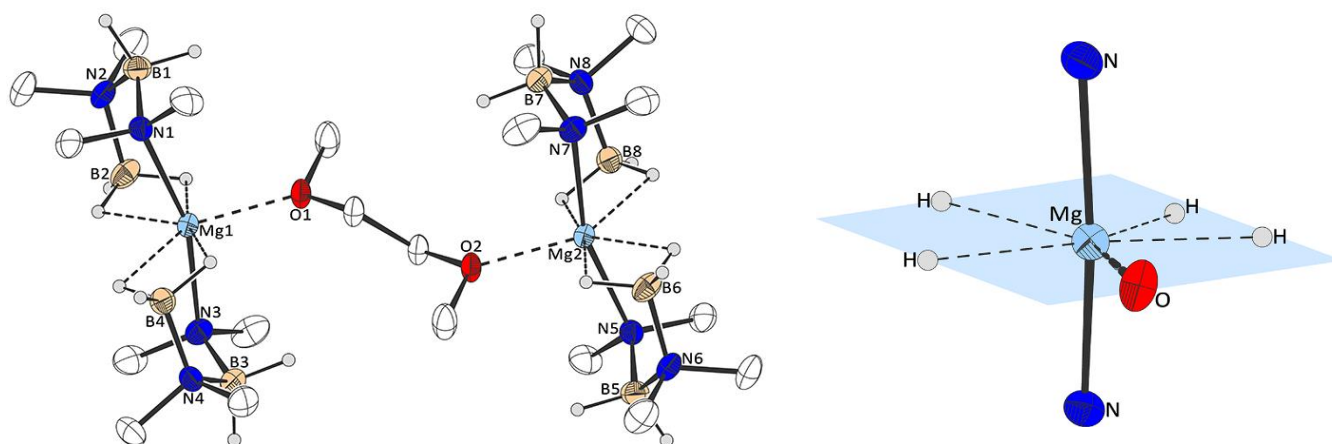

**Figure S28.** Molecular structure of magnesium complex **5** (left) and of coordination environment of magnesium in **5** (right) in the crystal (thermal ellipsoids at 50% probability level; hydrogen atoms except for (B)-H omitted for clarity; selected bond length: Mg1/2-O1/2: 218.1 pm, Mg1/2-N1/3/5/7: 216.1 pm / 215.9 pm).

## SUPPORTING INFORMATION

## Computational Details

All calculations were performed using the Gaussian 09, Revision D.01 package of programs.<sup>11</sup> All geometry optimizations have been carried out at the B3LYP-D3<sup>12</sup>/def2-TZVP<sup>13</sup> level of theory. Every optimized structure was confirmed to be either a minimum or a maximum on the potential energy surface by a subsequent frequency analysis (all positive eigenvalues for minima, one negative eigenvalue for maxima (transition state)) All transition states were verified to be connected to the corresponding minima by calculations along the intrinsic reaction coordinate.

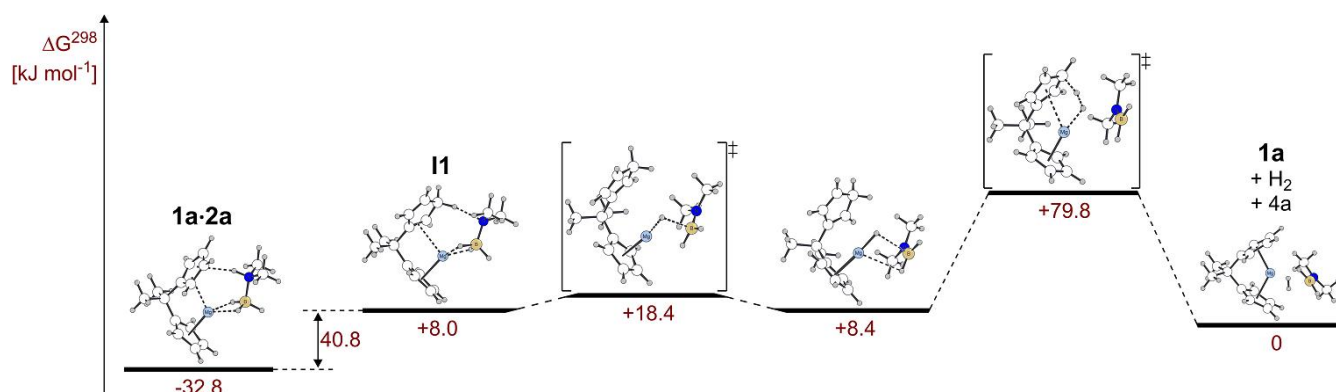

**Figure S29.** Calculated reaction pathway for the dehydrogenation reaction of dimethylamine borane, **2a**, with magnesocenophane, **1a**, without solvent coordination.

## optimized geometry of 1a

|    |             |             |             |
|----|-------------|-------------|-------------|
| Mg | 0.00000000  | 1.39696500  | 0.00000000  |
| C  | 0.00000000  | -1.54543800 | 0.00000000  |
| C  | 1.20375100  | -0.57238400 | 0.00000400  |
| C  | -1.20375100 | -0.57238400 | -0.00000400 |
| C  | 1.62587400  | 0.16403700  | -1.13915500 |
| C  | -1.62587400 | 0.16403700  | 1.13915500  |
| C  | 2.24721400  | 1.36448900  | -0.71281100 |
| C  | -2.24721400 | 1.36448900  | 0.71281100  |
| C  | -1.62587700 | 0.16404400  | -1.13915900 |
| C  | 1.62587700  | 0.16404300  | 1.13915900  |
| C  | -2.24721400 | 1.36449500  | -0.71280800 |
| C  | 2.24721400  | 1.36449500  | 0.71280800  |
| H  | 1.43358900  | -0.09937400 | -2.16689100 |
| H  | -1.43358900 | -0.09937400 | 2.16689100  |
| C  | 0.00000300  | -2.43862400 | -1.24534700 |
| C  | -0.00000300 | -2.43862400 | 1.24534700  |
| H  | 2.72675900  | 2.09524200  | -1.34546600 |
| H  | -2.72675900 | 2.09524200  | 1.34546600  |
| H  | -1.43358800 | -0.09935100 | -2.16689800 |
| H  | 1.43358800  | -0.09935100 | 2.16689800  |
| H  | -2.72675500 | 2.09525300  | -1.34545900 |
| H  | 2.72675500  | 2.09525300  | 1.34545900  |
| H  | -0.88609200 | -3.07573100 | -1.25256500 |
| H  | 0.88608200  | -3.07575600 | -1.25254500 |
| H  | 0.00002000  | -1.86210100 | -2.16950400 |
| H  | 0.88609200  | -3.07573100 | 1.25256500  |
| H  | -0.88608200 | -3.07575600 | 1.25254500  |
| H  | -0.00002000 | -1.86210100 | 2.16950400  |

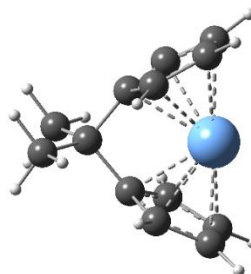

## optimized geometry of 1b

|    |             |             |             |
|----|-------------|-------------|-------------|
| Mg | 1.45066400  | -0.00000800 | 0.00000000  |
| C  | 1.66313100  | -2.23195100 | -0.71283000 |
| C  | 1.66313100  | -2.23195500 | 0.71282900  |
| C  | 0.40191000  | -1.74897900 | -1.13855300 |
| H  | 2.45344100  | -2.60614600 | -1.34565800 |
| C  | 0.40191200  | -1.74898700 | 1.13855700  |
| H  | 2.45344200  | -2.60615300 | 1.34565400  |
| C  | -0.39469600 | -1.42146100 | 0.00000300  |
| H  | 0.11425400  | -1.59657000 | -2.16846100 |
| H  | 0.11425700  | -1.59658500 | 2.16846600  |
| C  | 0.40192900  | 1.74898500  | -1.13855800 |
| C  | -0.39468100 | 1.42146400  | -0.00000300 |
| C  | 1.66315400  | 2.23194000  | -0.71282900 |
| H  | 0.11427200  | 1.59659300  | -2.16846800 |
| C  | 0.40192900  | 1.74897500  | 1.13855400  |
| C  | 1.66315400  | 2.23193500  | 0.71282900  |
| H  | 2.45346700  | 2.60613300  | -1.34565400 |
| H  | 0.11427100  | 1.59657600  | 2.16846200  |

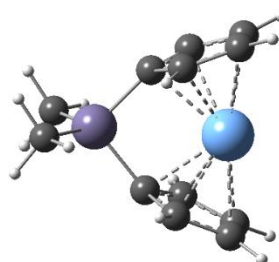

## SUPPORTING INFORMATION

|    |             |             |             |
|----|-------------|-------------|-------------|
| H  | 2.45346700  | 2.60612200  | 1.34565700  |
| C  | -2.68176100 | 0.00002200  | 1.55568100  |
| H  | -3.32031900 | 0.88508000  | 1.59655800  |
| H  | -3.32030900 | -0.88504300 | 1.59657700  |
| H  | -2.05573000 | 0.00003600  | 2.45059500  |
| C  | -2.68176300 | -0.00000100 | -1.55568000 |
| H  | -3.32035100 | -0.88504000 | -1.59653200 |
| H  | -3.32028300 | 0.88508400  | -1.59660000 |
| H  | -2.05573300 | -0.00006100 | -2.45059400 |
| Si | -1.63787200 | 0.00001000  | 0.00000000  |

## optimized geometry of 1c

|    |             |             |             |
|----|-------------|-------------|-------------|
| C  | 0.08349600  | -1.44526900 | -0.03551700 |
| C  | 1.78859900  | -0.85720400 | -1.75453400 |
| C  | 2.51381900  | -1.59843300 | 0.48416100  |
| C  | 0.08292100  | 1.44539400  | 0.03532200  |
| C  | 1.78823100  | 0.85768700  | 1.75450600  |
| C  | 2.51336000  | 1.59925000  | -0.48410100 |
| Mg | -1.73881900 | -0.00025700 | 0.00066000  |
| C  | -0.56839800 | -1.65880100 | 1.20772000  |
| C  | -0.84365900 | -1.82207600 | -1.04637600 |
| H  | 1.12767100  | -0.25370600 | -2.37429000 |
| H  | 2.81089100  | -0.53128400 | -1.93755100 |
| H  | 1.71062600  | -1.89045700 | -2.09507500 |
| H  | 3.49996800  | -1.13763200 | 0.39570200  |
| H  | 2.57123600  | -2.59589700 | 0.04500300  |
| H  | 2.28698200  | -1.72251400 | 1.54133100  |
| C  | -0.84421600 | 1.82240400  | 1.04614700  |
| C  | -0.56920700 | 1.65819200  | -1.20790800 |
| H  | 1.12740300  | 0.25398000  | 2.37416800  |
| H  | 2.81059200  | 0.53200000  | 1.93755700  |
| H  | 1.70999700  | 1.89088900  | 2.09513400  |
| H  | 3.49967200  | 1.13884100  | -0.39539800 |
| H  | 2.57030100  | 2.59678900  | -0.04505400 |
| H  | 2.28665500  | 1.72310400  | -1.54132600 |
| H  | -0.15084300 | -1.46405800 | 2.18168600  |
| C  | -1.88458300 | -2.12324800 | 0.97215400  |
| H  | -2.60476200 | -2.40166100 | 1.72571200  |
| C  | -2.06096600 | -2.22717700 | -0.43474100 |
| C  | -2.06179000 | 2.22672500  | 0.43445700  |
| H  | -2.92869300 | 2.62017000  | 0.94206900  |
| C  | -1.88551200 | 2.12222600  | -0.97239900 |
| H  | -2.60591400 | 2.39995600  | -1.72599700 |
| H  | -0.15170900 | 1.46313600  | -2.18183100 |
| H  | -0.67475300 | -1.78350900 | -2.10975400 |
| H  | -0.67514500 | 1.78444700  | 2.10952200  |
| H  | -2.92781400 | -2.62064400 | -0.94243200 |
| C  | 1.43854300  | -0.77791900 | -0.25691800 |
| C  | 1.43827500  | 0.77844000  | 0.25684500  |

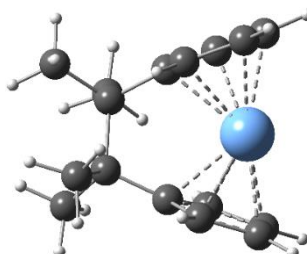

## optimized geometry of 1d

|    |             |             |             |
|----|-------------|-------------|-------------|
| Si | 1.49585900  | 1.19319100  | 0.10085200  |
| Si | 1.49589000  | -1.19318900 | -0.10062700 |
| C  | -0.28687300 | 1.75530900  | -0.04402700 |
| C  | 2.15382800  | 1.70788300  | 1.79351000  |
| C  | 2.52547900  | 1.98847800  | -1.26609400 |
| C  | -0.28686000 | -1.75528000 | 0.04400700  |
| C  | 2.15402400  | -1.70766800 | -1.79328900 |
| C  | 2.52539800  | -1.98862100 | 1.26631200  |
| Mg | -1.83886300 | -0.00001000 | -0.00010100 |
| C  | -1.06743100 | 1.81686400  | -1.23787200 |
| C  | -1.19579400 | 1.97950900  | 1.03361600  |
| H  | 1.56905600  | 1.25759700  | 2.59884900  |
| H  | 3.19025200  | 1.38870600  | 1.92336400  |
| H  | 2.11374800  | 2.79303600  | 1.91512800  |
| H  | 3.56278800  | 1.64763100  | -1.22757800 |
| H  | 2.52006000  | 3.07696000  | -1.17090000 |
| H  | 2.13158600  | 1.73629800  | -2.25310800 |
| C  | -1.19564500 | -1.97951000 | -1.03374500 |
| C  | -1.06755900 | -1.81688000 | 1.23776000  |
| H  | 1.56929000  | -1.25731900 | -2.59862100 |
| H  | 3.19043300  | -1.38839000 | -1.92301200 |
| H  | 2.11403200  | -2.79280800 | -1.91504700 |
| H  | 3.56267600  | -1.64765900 | 1.22799900  |
| H  | 2.52010100  | -3.07708600 | 1.17090200  |
| H  | 2.13133800  | -1.73667900 | 2.25331800  |
| H  | -0.69223800 | 1.68093300  | -2.24142000 |
| C  | -2.41953800 | 2.06801400  | -0.90127700 |
| H  | -3.23661000 | 2.19728800  | -1.59438800 |
| C  | -2.50050500 | 2.16818800  | 0.51459400  |
| C  | -2.50041200 | -2.16822600 | -0.51488100 |
| H  | -3.38834400 | -2.39200200 | -1.08602100 |
| C  | -2.41961800 | -2.06806200 | 0.90100000  |
| H  | -3.23676900 | -2.19736500 | 1.59401200  |
| H  | -0.69249400 | -1.68098000 | 2.24136100  |
| H  | -0.93488200 | 1.99552500  | 2.08101900  |
| H  | -0.93460500 | -1.99552900 | -2.08111600 |
| H  | -3.38851100 | 2.39195300  | 1.08562600  |

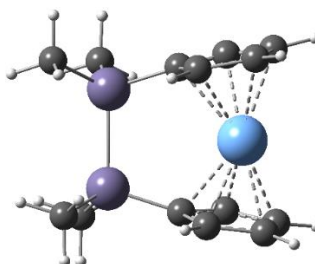

## SUPPORTING INFORMATION

## optimized geometry of 1a·dme

|    |             |             |             |
|----|-------------|-------------|-------------|
| Mg | 0.32566600  | 0.00000000  | 0.00000000  |
| O  | 1.99565000  | 0.57042600  | 1.18448500  |
| O  | 1.99564800  | -0.57042500 | -1.18448500 |
| C  | -2.59748200 | 0.00000000  | 0.00000100  |
| C  | -1.65150300 | 1.05711700  | -0.58813900 |
| C  | -1.65150200 | -1.05711700 | 0.58814000  |
| C  | -0.96485400 | 2.04853700  | 0.16122300  |
| C  | -0.96485400 | -2.04853700 | -0.16122300 |
| C  | 0.10205600  | 2.55494100  | -0.62428800 |
| C  | 0.10205600  | -2.55494200 | 0.62428700  |
| C  | -0.97470900 | -0.94870200 | 1.83338200  |
| C  | -0.97471000 | 0.94870100  | -1.83338200 |
| C  | 0.09222300  | -1.87756300 | 1.85517600  |
| C  | 0.09222200  | 1.87756300  | -1.85517600 |
| C  | 3.21406400  | 0.61080400  | 0.44489000  |
| C  | 3.21406200  | -0.61080700 | -0.44489000 |
| C  | 1.87434800  | 1.56424100  | 2.20375300  |
| C  | 1.87434600  | -1.56423900 | -2.20375500 |
| H  | -1.21967200 | 2.37528500  | 1.15744400  |
| H  | -1.21967300 | -2.37528500 | -1.15744400 |
| H  | 0.90039600  | 1.41455300  | 2.66190700  |
| H  | 0.90039300  | -1.41454900 | -2.66190900 |
| C  | -3.49641700 | 0.60671700  | 1.08584600  |
| C  | -3.49641800 | -0.60671700 | -1.08584400 |
| H  | 0.76932500  | 3.35747900  | -0.34518600 |
| H  | 0.76932500  | -3.35747900 | 0.34518500  |
| H  | -1.23809500 | -0.27909500 | 2.63741800  |
| H  | -1.23809700 | 0.27909400  | -2.63741800 |
| H  | 0.76907000  | -2.04353200 | 2.67981700  |
| H  | 0.76906800  | 2.04353200  | -2.67981800 |
| H  | 3.24711500  | 1.52722800  | -0.15370500 |
| H  | 4.07119700  | 0.58530800  | 1.12451300  |
| H  | 3.24711100  | -1.52723100 | 0.15370500  |
| H  | 4.07119600  | -0.58531300 | -1.12451300 |
| H  | 2.66348900  | 1.42895200  | 2.94723300  |
| H  | 1.92411100  | 2.56511700  | 1.77029600  |
| H  | 2.66348700  | -1.42894800 | -2.94723500 |
| H  | 1.92410900  | -2.56511600 | -1.77030000 |
| H  | -4.13336000 | -0.16387200 | 1.52442900  |
| H  | -4.13139800 | 1.38467300  | 0.65777200  |
| H  | -2.92014500 | 1.05791400  | 1.89255100  |
| H  | -4.13336100 | 0.16387200  | -1.52442700 |
| H  | -4.13139900 | -1.38467200 | -0.65777000 |
| H  | -2.92014700 | -1.05791400 | -1.89255000 |

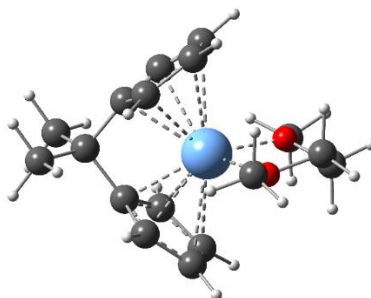

## optimized geometry of 1b·dme

|    |             |             |             |
|----|-------------|-------------|-------------|
| Mg | -0.54055000 | -0.41486900 | -0.03170900 |
| O  | -2.51850000 | -0.53057600 | -0.82866700 |
| O  | -1.66611500 | 0.73687500  | 1.31019100  |
| C  | 1.32304100  | 1.17555600  | -0.63982400 |
| C  | -0.48463400 | 2.13274900  | -1.73861400 |
| C  | 0.31378200  | 0.96414800  | -1.65926400 |
| C  | 0.35795200  | 0.19903800  | -2.42882900 |
| C  | 1.07340700  | 2.45818700  | -0.11116200 |
| H  | 1.62552800  | 2.91187700  | 0.70123300  |
| C  | -0.02285000 | 3.04127400  | -0.78086000 |
| C  | 1.47424700  | -1.52185700 | 0.40130900  |
| C  | 0.72059900  | -1.57021200 | 1.61228700  |
| H  | 0.97083900  | -1.05063000 | 2.52605300  |
| C  | -0.40645400 | -2.40447500 | 1.43046100  |
| C  | -0.37141300 | -2.88966900 | 0.10385100  |
| C  | 0.77427600  | -2.34891200 | -0.52600400 |
| H  | 1.06751900  | -2.52617400 | -1.55066700 |
| C  | -2.88144600 | 1.21654600  | 0.72555700  |
| H  | -2.63915600 | 2.02058900  | 0.02626300  |
| C  | -3.51635500 | 0.04205600  | 0.01787100  |
| C  | -2.98930100 | -1.57595000 | -1.67903500 |
| H  | -2.13492500 | -1.92177900 | -2.25461400 |
| C  | -1.09658700 | 1.61333200  | 2.29328700  |
| H  | -0.13959400 | 1.18273800  | 2.57234100  |
| C  | 3.53620200  | 0.55741900  | 1.39438500  |
| C  | 3.74768700  | -0.59525500 | -1.46787000 |
| H  | -1.29066400 | 2.29671100  | -2.44084100 |
| H  | -0.43518600 | 4.02266900  | -0.58671700 |
| H  | -1.14250300 | -2.65444800 | 2.17986900  |
| H  | -1.07220600 | -3.58424400 | -0.33479300 |
| H  | -3.55399300 | 1.58495200  | 1.50558600  |
| H  | -4.36876000 | 0.37982300  | -0.57946400 |
| H  | -3.85465900 | -0.71223000 | 0.73676500  |
| H  | -3.38612100 | -2.40463600 | -1.08701200 |
| H  | -3.75971500 | -1.19004300 | -2.35087200 |
| H  | -1.75817400 | 1.66163600  | 3.16188600  |
| H  | -0.93201600 | 2.60029300  | 1.86278700  |
| H  | 4.25233100  | -0.18601700 | 1.75111100  |
| H  | 4.08759500  | 1.46402600  | 1.13511000  |
| H  | 2.86638500  | 0.80223300  | 2.22175500  |
| H  | 3.19163600  | -0.99299800 | -2.31999400 |
| H  | 4.32189500  | 0.26397900  | -1.82188500 |
| H  | 4.44765000  | -1.36495900 | -1.13391000 |
| Si | 2.57690400  | -0.08885600 | -0.08722100 |

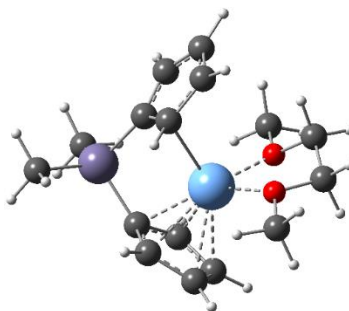

## SUPPORTING INFORMATION

## optimized geometry of 1c-dme

|    |             |             |             |
|----|-------------|-------------|-------------|
| C  | -1.18832700 | 1.40380200  | -0.29017100 |
| C  | -2.85304100 | 0.46950300  | -1.89571200 |
| C  | -3.62803300 | 1.65069700  | 0.12287300  |
| C  | -1.18834300 | -1.40380200 | 0.29018800  |
| C  | -2.85308300 | -0.46949300 | 1.89569400  |
| C  | -3.62804400 | -1.65067700 | -0.12290600 |
| Mg | 0.73949200  | -0.00000800 | 0.00001100  |
| C  | -0.58525200 | 1.91384000  | 0.88809200  |
| C  | -0.28500800 | 1.68026400  | -1.35457100 |
| H  | -2.16177600 | -0.22497600 | -2.36913900 |
| H  | -3.86297700 | 0.08387100  | -2.02671300 |
| H  | -2.79333500 | 1.41627300  | -2.43388000 |
| H  | -4.61101900 | 1.17348300  | 0.11471600  |
| H  | -3.67954500 | 2.53325800  | -0.51725600 |
| H  | -3.42236100 | 1.99702700  | 1.13371900  |
| C  | -0.28503800 | -1.68025300 | 1.35460300  |
| C  | -0.58525300 | -1.91384900 | -0.88806300 |
| H  | -2.16182400 | 0.22498400  | 2.36913500  |
| H  | -3.86302000 | -0.08385800 | 2.02667400  |
| H  | -2.79338900 | -1.41626400 | 2.43386100  |
| H  | -4.61102400 | -1.17345300 | -0.11476300 |
| H  | -3.67957300 | -2.53323800 | 0.51722100  |
| H  | -3.42235900 | -1.99700700 | -1.13374900 |
| H  | -1.00962900 | 1.89161900  | 1.87834100  |
| C  | 0.64928000  | 2.51641300  | 0.54697800  |
| H  | 1.31866700  | 3.01429300  | 1.23197200  |
| C  | 0.83408300  | 2.37629600  | -0.83690400 |
| C  | 0.83406000  | -2.37629000 | 0.83695700  |
| H  | 1.68109700  | -2.72149300 | 1.40913300  |
| C  | 0.64927600  | -2.51641900 | -0.54692700 |
| H  | 1.31867300  | -3.01430600 | -1.23190700 |
| H  | -1.00961600 | -1.89163700 | -1.87831700 |
| O  | 2.48948800  | 0.09170200  | 1.31305100  |
| O  | 2.48945800  | -0.09172200 | -1.31307500 |
| C  | 3.70595100  | 0.39814500  | 0.64248200  |
| C  | 3.70594500  | -0.39813800 | -0.64253700 |
| C  | 2.41347100  | 0.54689800  | 2.66134800  |
| H  | 1.42563800  | 0.27502000  | 3.02432200  |
| C  | 2.41341300  | -0.54691700 | -2.66137000 |
| H  | 1.42558000  | -0.27502300 | -3.02432900 |
| H  | -0.44484300 | 1.45074800  | -2.39563600 |
| H  | -0.44488600 | -1.45072700 | 2.39566300  |
| H  | 1.68112700  | 2.72150500  | -1.40906700 |
| H  | 3.74812800  | 1.47236600  | 0.43350900  |
| H  | 4.56367400  | 0.11337700  | 1.26030200  |
| H  | 3.74815600  | -1.47235800 | -0.43356700 |
| H  | 4.56364500  | -0.11334800 | -1.26037800 |
| H  | 3.18010600  | 0.05328100  | 3.26455000  |
| H  | 2.53471500  | 1.63108700  | 2.71337400  |
| H  | 3.18004600  | -0.05331200 | -3.26458400 |
| H  | 2.53464200  | -1.63110800 | -2.71339700 |
| C  | -2.53288400 | -0.69944000 | 0.40615200  |
| C  | -2.53287000 | 0.69945000  | -0.40616400 |

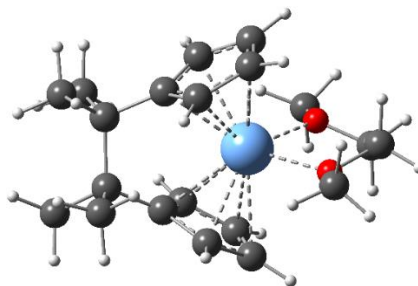

## optimized geometry of 1d-dme

|    |             |             |             |
|----|-------------|-------------|-------------|
| Si | 2.16096100  | 1.30493500  | 0.12679900  |
| Si | 2.64376600  | -0.98008300 | -0.21886100 |
| C  | 0.39925200  | 1.58910900  | -0.41320300 |
| C  | 2.30839400  | 1.69676400  | 1.97648100  |
| C  | 3.33513000  | 2.45911900  | -0.80489400 |
| C  | 1.03104600  | -1.83220500 | 0.17663000  |
| C  | 3.11146300  | -1.36195300 | -2.00900900 |
| C  | 4.01553500  | -1.59630400 | 0.92544000  |
| Mg | -0.92900200 | -0.45249900 | -0.03845600 |
| C  | -0.21879900 | 1.10677000  | -1.63295600 |
| C  | -0.41629700 | 2.66551300  | 0.02592900  |
| H  | 1.76012300  | 0.97190400  | 2.58254500  |
| H  | 3.35159600  | 1.67213100  | 2.29984000  |
| H  | 1.91482900  | 2.69203700  | 2.19911700  |
| H  | 4.37515300  | 2.29851100  | -0.50814400 |
| H  | 3.08107500  | 3.50383700  | -0.60815900 |
| H  | 3.26120700  | 2.29647700  | -1.88217800 |
| C  | 0.15632500  | -2.50088600 | -0.72888300 |
| C  | 0.36638200  | -1.83006300 | 1.43829400  |
| H  | 2.34253300  | -1.01943200 | -2.70457700 |
| H  | 4.04645100  | -0.86770400 | -2.28200200 |
| H  | 3.24312800  | -2.43737600 | -2.15433500 |
| H  | 4.95187000  | -1.06176800 | 0.74644700  |
| H  | 4.19718700  | -2.66296400 | 0.77129700  |
| H  | 3.74339500  | -1.45168700 | 1.97318400  |
| H  | 0.24277800  | 0.42313000  | -2.33572400 |
| C  | -1.35276300 | 1.90321400  | -1.89954600 |
| H  | -1.99701300 | 1.81409000  | -2.76309100 |
| C  | -1.47363500 | 2.85377400  | -0.87275300 |
| C  | -0.99894400 | -2.91836000 | -0.03129900 |
| H  | -1.83966500 | -3.44984600 | -0.44995600 |
| C  | -0.87193000 | -2.49973100 | 1.30998900  |
| H  | -1.59194900 | -2.66548100 | 2.09771100  |
| H  | 0.76151100  | -1.41494000 | 2.35406300  |
| O  | -2.95424700 | -0.74326000 | -0.76357500 |
| O  | -2.15865900 | 0.47878900  | 1.39503400  |
| C  | -3.87961200 | 0.17887400  | -0.18557900 |
| C  | -3.55818300 | 0.23640400  | 1.28934000  |
| C  | -3.21752800 | -1.07178400 | -2.12727800 |
| H  | -2.40983700 | -1.72472000 | -2.44933200 |
| C  | -1.70270100 | 0.84444500  | 2.69588800  |

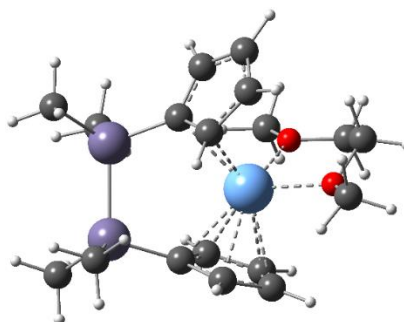



## SUPPORTING INFORMATION

|   |             |             |             |
|---|-------------|-------------|-------------|
| H | -0.63673400 | 1.03227700  | 2.61063400  |
| H | -0.24882600 | 3.24670500  | 0.92251400  |
| H | 0.35877100  | -2.67934800 | -1.77472000 |
| H | -2.25797300 | 3.59358500  | -0.78479000 |
| H | -3.74093100 | 1.15999600  | -0.64754300 |
| H | -4.90628300 | -0.16940900 | -0.33577700 |
| H | -3.80254400 | -0.70929600 | 1.78517100  |
| H | -4.11825800 | 1.04884400  | 1.76175800  |
| H | -4.17234500 | -1.59806100 | -2.20543000 |
| H | -3.23078400 | -0.17191800 | -2.74430200 |
| H | -2.20638100 | 1.75725300  | 3.02136000  |
| H | -1.88578600 | 0.03478700  | 3.40753200  |

optimized geometry of 1a·F<sup>-</sup>

|    |             |             |             |
|----|-------------|-------------|-------------|
| Mg | 0.00000300  | 1.25931500  | -0.00000300 |
| C  | -2.60874200 | 0.92982400  | 0.70124200  |
| C  | -2.60874200 | 0.92982000  | -0.70124800 |
| C  | -1.74300300 | -0.10129100 | 1.13928600  |
| H  | -3.14417200 | 1.61786200  | 1.33845800  |
| C  | -1.74300300 | -0.10129700 | -1.13928600 |
| H  | -3.14417200 | 1.61785500  | -1.33846700 |
| C  | -1.21430300 | -0.76617100 | 0.00000200  |
| H  | -1.52244700 | -0.33915300 | 2.16900900  |
| H  | -1.52244600 | -0.33916500 | -2.16900700 |
| C  | 1.74300400  | -0.10129200 | 1.13928600  |
| C  | 1.21430600  | -0.76617400 | 0.00000200  |
| C  | 2.60873900  | 0.92982600  | 0.70124300  |
| H  | 1.52244800  | -0.33915400 | 2.16900900  |
| C  | 1.74300400  | -0.10129800 | -1.13928500 |
| C  | 2.60873900  | 0.92982300  | -0.70124700 |
| H  | 3.14416700  | 1.61786600  | 1.33845800  |
| H  | 1.52244800  | -0.33916600 | -2.16900700 |
| H  | 3.14416700  | 1.61785900  | -1.33846700 |
| C  | 0.00000100  | -1.70145500 | 0.00000500  |
| C  | 0.00000000  | -2.60450800 | -1.24215600 |
| H  | 0.88909200  | -3.24017600 | -1.24826000 |
| H  | -0.88909500 | -3.24017400 | -1.24826000 |
| H  | 0.00000000  | -2.02628800 | -2.16516300 |
| C  | -0.00000100 | -2.60450200 | 1.24217100  |
| H  | -0.88909500 | -3.24016700 | 1.24827800  |
| H  | 0.88909200  | -3.24016900 | 1.24827800  |
| H  | 0.00000000  | -2.02627600 | 2.16517400  |
| F  | -0.00000200 | 3.06209400  | -0.00000800 |

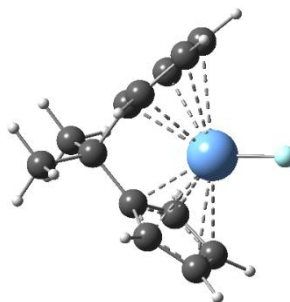optimized geometry of 1b·F<sup>-</sup>

|    |             |             |             |
|----|-------------|-------------|-------------|
| Mg | 1.31279000  | -0.00014100 | 0.00000000  |
| C  | 1.22664600  | -2.69924400 | -0.70286600 |
| C  | 1.22664900  | -2.69924100 | 0.70286500  |
| C  | 0.13590300  | -1.91953000 | -1.13996100 |
| H  | 1.96436500  | -3.16946700 | -1.33654800 |
| C  | 0.13590200  | -1.91953200 | 1.13996000  |
| H  | 1.96436900  | -3.16946200 | 1.33654700  |
| C  | -0.58325700 | -1.44089400 | 0.00000000  |
| H  | -0.12672800 | -1.72472100 | -2.17099500 |
| H  | -0.12672900 | -1.72472400 | 2.17099400  |
| C  | 0.13624900  | 1.91950100  | -1.13996100 |
| C  | -0.58300200 | 1.44100200  | 0.00000000  |
| C  | 1.22714200  | 2.69900200  | -0.70286500 |
| H  | -0.12642300 | 1.72474400  | -2.17099400 |
| C  | 0.13625000  | 1.91949900  | 1.13996100  |
| C  | 1.22714200  | 2.69900200  | 0.70286600  |
| H  | 1.96496100  | 3.16907000  | -1.33654600 |
| H  | -0.12642100 | 1.72474200  | 2.17099500  |
| H  | 1.96496100  | 3.16907000  | 1.33654600  |
| C  | -2.83448800 | 0.00025300  | 1.54564800  |
| H  | -3.47128600 | 0.88788800  | 1.58010800  |
| H  | -3.47138400 | -0.88731000 | 1.58015200  |
| H  | -2.21327600 | 0.00024200  | 2.44442300  |
| C  | -2.83448700 | 0.00025300  | -1.54564900 |
| H  | -3.47138300 | -0.88731000 | -1.58015400 |
| H  | -3.47128700 | 0.88788700  | -1.58010700 |
| H  | -2.21327500 | 0.00024500  | -2.44442400 |
| Si | -1.75203500 | 0.00016000  | 0.00000000  |
| F  | 3.11496100  | -0.00020900 | 0.00000000  |

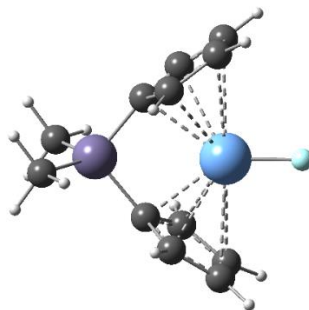optimized geometry of 1c·F<sup>-</sup>

|    |             |             |             |
|----|-------------|-------------|-------------|
| Mg | 1.76315900  | 0.00002300  | 0.00000500  |
| C  | -0.33720800 | 1.42682400  | -0.07243900 |
| C  | 0.25230200  | 1.77581400  | 1.16639000  |
| C  | 0.59127500  | 1.80686600  | -1.08206100 |
| C  | 1.51347600  | 2.36783500  | 0.92537600  |
| H  | -0.17865900 | 1.61775400  | 2.14266000  |
| C  | 1.71981100  | 2.39884800  | -0.46510200 |
| H  | 0.45839500  | 1.68802500  | -2.14583700 |
| H  | 2.21445900  | 2.69709300  | 1.67734100  |
| H  | 2.61110500  | 2.73869300  | -0.96826800 |
| C  | 0.25236100  | -1.77582900 | -1.16643200 |
| C  | 1.51355100  | -2.36781300 | -0.92541600 |
| C  | -0.33715800 | -1.42684400 | 0.07239600  |
| H  | -0.17859500 | -1.61777800 | -2.14270300 |
| C  | 1.71987900  | -2.39883200 | 0.46506100  |
| H  | 2.21454100  | -2.69705400 | -1.67738200 |
| C  | 0.59132600  | -1.80687800 | 1.08201800  |
| H  | 2.61117600  | -2.73866300 | 0.96823100  |
| H  | 0.45843700  | -1.68804900 | 2.14579500  |
| C  | -1.68295800 | -0.75512600 | 0.29105300  |

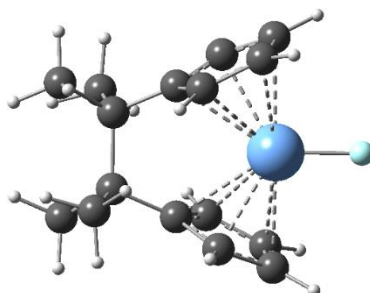

## SUPPORTING INFORMATION

|   |             |             |             |
|---|-------------|-------------|-------------|
| C | -1.68299200 | 0.75508000  | -0.29108500 |
| C | -2.00747100 | -0.75885700 | 1.79835400  |
| H | -3.02486600 | -0.41380800 | 1.98708400  |
| H | -1.92691400 | -1.77601700 | 2.18508600  |
| H | -1.32421300 | -0.13331300 | 2.36886200  |
| C | -2.77986500 | -1.61204200 | -0.37900700 |
| H | -2.82890600 | -2.58424200 | 0.11645900  |
| H | -3.76554500 | -1.14306400 | -0.29903600 |
| H | -2.57086400 | -1.79742400 | -1.43091900 |
| C | -2.77985600 | 1.61192100  | 0.37912700  |
| H | -2.82893200 | 2.58417300  | -0.11623400 |
| H | -3.76553700 | 1.14294200  | 0.29917700  |
| H | -2.57078200 | 1.79718600  | 1.43104900  |
| C | -2.00761300 | 0.75892000  | -1.79836900 |
| H | -3.02498800 | 0.41380100  | -1.98706400 |
| H | -1.92718400 | 1.77612600  | -2.18500500 |
| H | -1.32433600 | 0.13350600  | -2.36899300 |
| F | 3.58679300  | 0.00005800  | 0.00005000  |

optimized geometry of 1d·F<sup>-</sup>

|    |             |             |             |
|----|-------------|-------------|-------------|
| Mg | -2.15432600 | 0.34547800  | -0.13671200 |
| C  | -0.52603400 | -1.43622200 | 0.19336000  |
| C  | -1.03892200 | -1.05335800 | 1.47039900  |
| C  | -1.61875000 | -2.04811400 | -0.49920100 |
| C  | -2.39819700 | -1.42683100 | 1.55135200  |
| H  | -0.47778900 | -0.55082300 | 2.24334300  |
| C  | -2.75217500 | -2.04649000 | 0.33158500  |
| H  | -1.58059200 | -2.43435600 | -1.50749500 |
| H  | -3.06204200 | -1.23540400 | 2.38166500  |
| H  | -3.74494000 | -2.35961600 | 0.04894700  |
| C  | -0.02296300 | 1.96101400  | -1.23172500 |
| C  | -1.32391300 | 2.43356700  | -0.98795300 |
| C  | 0.67249500  | 1.84379200  | 0.00508800  |
| H  | 0.37175800  | 1.70333500  | -2.20570000 |
| C  | -1.46094100 | 2.60711900  | 0.42430800  |
| H  | -2.07658400 | 2.67402000  | -1.72444500 |
| C  | -0.23203100 | 2.25260400  | 1.01498700  |
| H  | -2.32396900 | 3.02754300  | 0.92198800  |
| H  | -0.03427700 | 2.23807000  | 2.07821600  |
| C  | 2.70732300  | 0.77499500  | 2.05816300  |
| H  | 3.55744900  | 0.10533300  | 2.21244800  |
| H  | 3.01166000  | 1.78570100  | 2.34502400  |
| H  | 1.90796700  | 0.46134500  | 2.73265600  |
| C  | 3.60338600  | 1.19940700  | -0.84311700 |
| H  | 3.99570800  | 2.18233800  | -0.56674600 |
| H  | 4.41408800  | 0.46982700  | -0.75770400 |
| H  | 3.30141800  | 1.24433100  | -1.89216000 |
| C  | 2.21100600  | -2.84273000 | 0.38358200  |
| H  | 1.76226300  | -3.79138100 | 0.07498300  |
| H  | 3.25729800  | -2.83860100 | 0.06301500  |
| H  | 2.19240400  | -2.80503000 | 1.47532100  |
| C  | 1.30470800  | -1.57504900 | -2.23877100 |
| H  | 2.33277000  | -1.59385500 | -2.60948700 |
| H  | 0.81963500  | -2.50770200 | -2.54064400 |
| H  | 0.78067900  | -0.75088800 | -2.72646700 |
| Si | 2.12240100  | 0.73918100  | 0.25419300  |
| Si | 1.25147500  | -1.37301500 | -0.35229000 |
| F  | -3.83746700 | 0.64905900  | -0.75835600 |

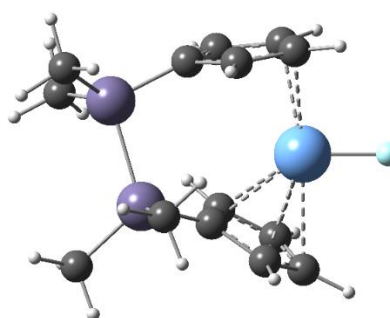

## optimized geometry of 1a·2a

|    |             |             |             |
|----|-------------|-------------|-------------|
| Mg | 0.04881800  | 1.04287000  | 0.31390000  |
| C  | -1.23624100 | -1.67144500 | 1.27488300  |
| C  | -1.33507300 | -2.32808300 | 0.04568600  |
| C  | 0.03574100  | -1.02389100 | 1.32662800  |
| H  | -1.94952800 | -1.70822400 | 2.08743600  |
| C  | -0.12964700 | -2.12146700 | -0.67021900 |
| H  | -2.17738600 | -2.91273600 | -0.30008900 |
| C  | 0.74540000  | -1.36325100 | 0.11552500  |
| H  | 0.50748500  | -0.69971300 | 2.24713900  |
| H  | 0.07867700  | -2.50009100 | -1.65911200 |
| C  | 2.24700000  | 1.37291300  | 1.01184400  |
| C  | 2.22122000  | 0.58491000  | -0.16680500 |
| C  | 1.76017400  | 2.67135400  | 0.70573100  |
| H  | 2.54264400  | 1.03489900  | 1.99203600  |
| C  | 1.74206000  | 1.42349300  | -1.21162600 |
| C  | 1.45485500  | 2.70255000  | -0.67540900 |
| H  | 1.70087800  | 3.50524100  | 1.38795000  |
| H  | 1.58255400  | 1.12859600  | -2.23654700 |
| H  | 1.10243700  | 3.55898200  | -1.22869700 |
| C  | 2.19256800  | -0.94466900 | -0.20212900 |
| C  | 2.62104900  | -1.46186400 | -1.58094800 |
| H  | 3.63263900  | -1.12249600 | -1.80910900 |
| H  | 2.60983100  | -2.55291800 | -1.60039000 |
| H  | 1.95935500  | -1.10972800 | -2.37238900 |
| C  | 3.14275300  | -1.53853600 | 0.85377600  |
| H  | 3.09410100  | -2.62850300 | 0.82724400  |
| H  | 4.17222800  | -1.22807700 | 0.66186600  |
| H  | 2.87411000  | -1.22380400 | 1.86149600  |
| H  | -1.76325100 | 1.80593500  | 0.80046000  |
| H  | -1.36547400 | 1.22253200  | -1.11305100 |
| B  | -2.22729500 | 1.55196800  | -0.31088400 |
| H  | -2.82824600 | 2.50408500  | -0.71854400 |
| N  | -3.18423100 | 0.29299800  | -0.14612300 |
| H  | -2.58038100 | -0.49160300 | 0.17403000  |
| C  | -3.77365800 | -0.12294200 | -1.44174500 |
| H  | -4.39255900 | -1.00945800 | -1.30368400 |
| H  | -4.37600700 | 0.69274000  | -1.83816400 |
| H  | -2.96704700 | -0.35170900 | -2.13368200 |

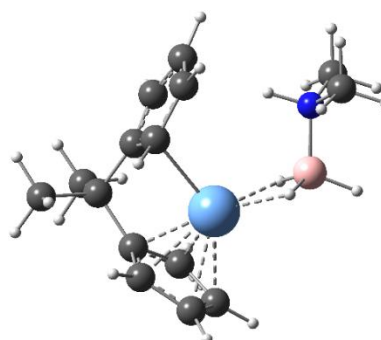

## SUPPORTING INFORMATION

|   |             |             |            |
|---|-------------|-------------|------------|
| C | -4.22177100 | 0.50199800  | 0.88967100 |
| H | -4.84313700 | 1.35003600  | 0.60634900 |
| H | -4.83867000 | -0.39118600 | 0.99098400 |
| H | -3.73355700 | 0.71551000  | 1.83776800 |

## optimized geometry of 1b·2a

|    |             |             |             |
|----|-------------|-------------|-------------|
| Mg | 0.06445500  | 1.01384900  | -0.25400600 |
| C  | 1.41074100  | -1.67700000 | -1.49594100 |
| C  | 1.56713900  | -2.36680600 | -0.27974600 |
| C  | 0.16244700  | -1.01429100 | -1.46333200 |
| H  | 2.09413600  | -1.69085900 | -2.33407600 |
| C  | 0.42198800  | -2.13960800 | 0.50667000  |
| H  | 2.41153600  | -2.98557100 | -0.00444400 |
| C  | -0.49070000 | -1.33041400 | -0.20881300 |
| H  | -0.32544300 | -0.58961100 | -2.33392700 |
| H  | 0.25543800  | -2.53291100 | 1.49966200  |
| C  | -2.01450800 | 1.68753500  | -1.09926200 |
| C  | -2.20477500 | 0.99396200  | 0.13367200  |
| C  | -1.32214000 | 2.89818700  | -0.85288700 |
| H  | -2.32336100 | 1.33390500  | -2.07207500 |
| C  | -1.62001500 | 1.82228900  | 1.14200100  |
| C  | -1.08350100 | 2.98290300  | 0.54075700  |
| H  | -1.06576200 | 3.64807400  | -1.58580100 |
| H  | -1.56754800 | 1.58410900  | 2.19433700  |
| H  | -0.59693100 | 3.79973500  | 1.05139100  |
| C  | -2.63059600 | -1.44984700 | 1.99237500  |
| H  | -3.63852400 | -1.15281000 | 2.29012300  |
| H  | -2.56335100 | -2.53772400 | 2.06402700  |
| H  | -1.92834600 | -1.02372500 | 2.71196600  |
| C  | -3.47791900 | -1.59608200 | -0.98115400 |
| H  | -3.42013500 | -2.68675500 | -0.98829900 |
| H  | -4.50193700 | -1.30558800 | -0.73473200 |
| H  | -3.26382000 | -1.24695000 | -1.99357900 |
| H  | 1.90622500  | 1.73774900  | -0.68515000 |
| H  | 1.46373700  | 1.09844900  | 1.20021900  |
| B  | 2.34280700  | 1.44871600  | 0.42521000  |
| H  | 2.94053900  | 2.38276700  | 0.87834300  |
| N  | 3.29931400  | 0.19183600  | 0.23771900  |
| H  | 2.71090100  | -0.57763200 | -0.13381600 |
| C  | 3.85037300  | -0.27974400 | 1.53100000  |
| H  | 4.47003100  | -1.16271700 | 1.37463500  |
| H  | 4.44376500  | 0.51664400  | 1.97687000  |
| H  | 3.02340200  | -0.53229100 | 2.18979000  |
| C  | 4.36720600  | 0.44207300  | -0.75790400 |
| H  | 4.98425900  | 1.27235300  | -0.41819400 |
| H  | 4.98205500  | -0.44947900 | -0.88287800 |
| H  | 3.90634000  | 0.70157700  | -1.70806900 |
| Si | -2.25673800 | -0.87087900 | 0.24675000  |

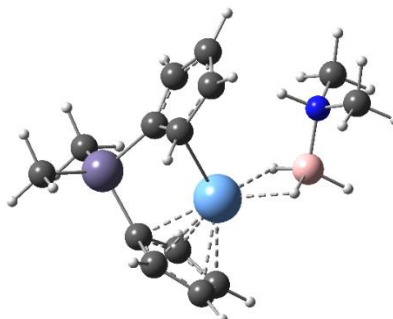

## optimized geometry of 1c·2a

|    |             |             |             |
|----|-------------|-------------|-------------|
| C  | -0.45396400 | -1.31638000 | -0.11931000 |
| C  | -1.90380700 | -1.35265600 | 1.91989400  |
| C  | -2.63421300 | -2.48626800 | -0.15170100 |
| C  | -1.77203300 | 1.32587600  | -0.01829900 |
| C  | -3.25030500 | -0.03529200 | -1.50816800 |
| C  | -3.90839000 | 0.38537600  | 0.82361900  |
| Mg | 0.48879100  | 0.84153500  | -0.15158600 |
| C  | 0.03791800  | -1.06691500 | -1.45155800 |
| C  | 0.60208600  | -1.97808900 | 0.55992600  |
| H  | -1.36799700 | -0.53425000 | 2.39783300  |
| H  | -2.91621100 | -1.38175300 | 2.31730800  |
| H  | -1.42334800 | -2.28251700 | 2.22114600  |
| H  | -3.68850300 | -2.49339500 | 0.13526000  |
| H  | -2.16626900 | -3.37903500 | 0.26566200  |
| H  | -2.56942700 | -2.56245300 | -1.23547100 |
| C  | -1.25182000 | 2.05200400  | -1.12124600 |
| C  | -1.16761600 | 1.87471600  | 1.14718800  |
| H  | -2.50030700 | -0.32830900 | -2.23892100 |
| H  | -4.04590800 | -0.77850800 | -1.53730500 |
| H  | -3.67845600 | 0.91457000  | -1.83055200 |
| H  | -4.57171600 | -0.48054800 | 0.87952200  |
| H  | -4.47902900 | 1.21630000  | 0.40548600  |
| H  | -3.62417300 | 0.66636200  | 1.83549600  |
| H  | -0.53136400 | -0.66911300 | -2.27536700 |
| C  | 1.33913200  | -1.60096700 | -1.56456300 |
| H  | 1.94467300  | -1.58446700 | -2.45948600 |
| C  | 1.68161200  | -2.17250300 | -0.32576300 |
| C  | -0.33267900 | 3.02125100  | -0.64379800 |
| H  | 0.21548400  | 3.72720400  | -1.24785900 |
| C  | -0.28533300 | 2.91353700  | 0.76127900  |
| H  | 0.31274200  | 3.51555700  | 1.42714300  |
| H  | -1.35890600 | 1.57438900  | 2.16386900  |
| H  | 0.57585400  | -2.32476700 | 1.58023200  |
| H  | -1.49465400 | 1.88763800  | -2.15819900 |
| H  | 2.57706300  | -2.74024000 | -0.10419900 |
| B  | 2.83867100  | 1.22283000  | 0.33463100  |
| H  | 2.01052500  | 0.91254300  | 1.17933300  |
| H  | 3.43916800  | 2.19906700  | 0.68192300  |
| H  | 2.34541400  | 1.40085500  | -0.77071400 |
| N  | 3.81102100  | -0.02929100 | 0.19352900  |
| H  | 3.18393700  | -0.80600000 | -0.07878900 |
| C  | 4.43797800  | -0.39957100 | 1.48326000  |
| H  | 3.65183900  | -0.61049700 | 2.20457600  |
| H  | 5.06675800  | -1.28188600 | 1.35949100  |
| H  | 5.03935400  | 0.43520800  | 1.83924700  |
| C  | 4.81287800  | 0.15067500  | -0.88170800 |
| H  | 5.43597500  | -0.73954900 | -0.97288700 |
| H  | 4.29135200  | 0.32947200  | -1.81910300 |

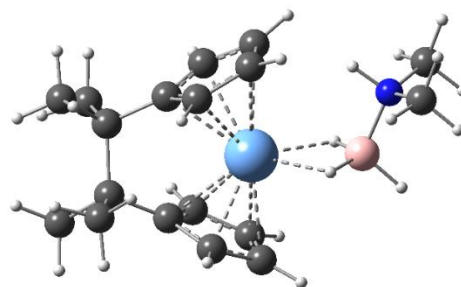

## SUPPORTING INFORMATION

|   |             |             |             |
|---|-------------|-------------|-------------|
| H | 5.43424900  | 1.01319800  | -0.64649700 |
| C | -2.68558700 | 0.11110100  | -0.07991300 |
| C | -1.90654200 | -1.22966400 | 0.38302800  |

## optimized geometry of 1d·2a

|    |             |             |             |
|----|-------------|-------------|-------------|
| C  | -0.16916200 | -1.32076100 | 0.33235100  |
| C  | 1.29380600  | -1.71563900 | -2.31481700 |
| C  | 2.24953500  | -3.21904700 | 0.18747400  |
| C  | 1.65146000  | 1.70286800  | 0.01283500  |
| C  | 3.62307000  | 0.17574200  | 1.79109000  |
| C  | 4.22926100  | 0.53205500  | -1.21709600 |
| Mg | -0.60457700 | 0.99935700  | 0.16025400  |
| C  | -0.44955600 | -0.83883800 | 1.67124700  |
| C  | -1.31989800 | -2.07314500 | -0.04312800 |
| H  | 0.89994100  | -0.78334000 | -2.72609200 |
| H  | 2.24145800  | -1.92870100 | -2.81437700 |
| H  | 0.59499400  | -2.51629300 | -2.57079100 |
| H  | 3.23140900  | -3.41250500 | -0.25265000 |
| H  | 1.59279100  | -4.05623300 | -0.06193700 |
| H  | 2.36455300  | -3.19682800 | 1.27320900  |
| C  | 1.06592300  | 2.37324200  | 1.12491200  |
| C  | 0.95980800  | 2.17781100  | -1.14502600 |
| H  | 2.85722100  | 0.01376300  | 2.55236100  |
| H  | 4.32907100  | -0.65542000 | 1.85295200  |
| H  | 4.15856900  | 1.09497600  | 2.04135600  |
| H  | 4.91057700  | -0.32189500 | -1.24373100 |
| H  | 4.81411300  | 1.42732700  | -0.99181800 |
| H  | 3.80572900  | 0.65239200  | -2.21650400 |
| H  | 0.26391600  | -0.34955900 | 2.32238000  |
| C  | -1.71677100 | -1.29226100 | 2.06358500  |
| H  | -2.19012600 | -1.09860500 | 3.01534000  |
| C  | -2.24684300 | -2.06865400 | 1.01064400  |
| C  | 0.05073300  | 3.24349900  | 0.66060800  |
| H  | -0.56115700 | 3.89100900  | 1.26959400  |
| C  | -0.00892200 | 3.12717100  | -0.74751600 |
| H  | -0.68530600 | 3.65816300  | -1.39901700 |
| H  | 1.15586900  | 1.87385500  | -2.16293800 |
| H  | -1.44021000 | -2.59437300 | -0.98288000 |
| H  | 1.35133100  | 2.23991800  | 2.15756300  |
| H  | -3.18299400 | -2.61345700 | 1.03762600  |
| B  | -2.93556900 | 1.29267500  | -0.53348300 |
| H  | -2.05258600 | 0.92561800  | -1.29396700 |
| H  | -3.50419000 | 2.24621900  | -0.98553300 |
| H  | -2.52131900 | 1.54237100  | 0.59022700  |
| N  | -3.93047600 | 0.06043700  | -0.37495700 |
| H  | -3.35871900 | -0.69969000 | 0.03308600  |
| C  | -4.44074000 | -0.41930800 | -1.67959100 |
| H  | -3.59503800 | -0.69502000 | -2.30512700 |
| H  | -5.08829700 | -1.28522200 | -1.53800900 |
| H  | -4.99765700 | 0.38314200  | -2.16059600 |
| C  | -5.02641700 | 0.34348100  | 0.58000300  |
| H  | -5.66571900 | -0.53266700 | 0.69246800  |
| H  | -4.59093400 | 0.60202000  | 1.54229700  |
| H  | -5.61247700 | 1.18362800  | 0.21115800  |
| Si | 1.52268600  | -1.59061300 | -0.44016000 |
| Si | 2.86656900  | 0.28757000  | 0.06572800  |

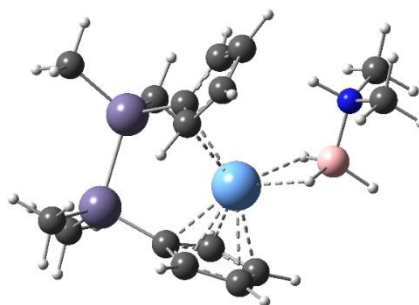optimized geometry of 1a·(Me<sub>3</sub>NBH<sub>3</sub>)

|    |             |             |             |
|----|-------------|-------------|-------------|
| Mg | 0.06770200  | 0.21927400  | 0.00580800  |
| C  | 3.01969300  | -0.23202100 | -0.00903600 |
| C  | 2.24755600  | 1.09676800  | -0.00131600 |
| C  | 1.88833100  | -1.27266100 | -0.00189700 |
| C  | 1.60034600  | 1.65491600  | -1.13549400 |
| C  | 1.12740800  | -1.62971000 | 1.14167200  |
| C  | 0.57298500  | 2.52291200  | -0.69528700 |
| C  | -0.10261700 | -2.18630200 | 0.71940100  |
| C  | 1.10987600  | -1.62721500 | -1.13485300 |
| C  | 1.61071400  | 1.64679900  | 1.14258600  |
| C  | -0.11365400 | -2.18467600 | -0.69464200 |
| C  | 0.57915100  | 2.51766500  | 0.71798400  |
| H  | 1.81985200  | 1.42435300  | -2.16601500 |
| H  | 1.41637600  | -1.46922900 | 2.16817000  |
| C  | 3.89764000  | -0.36629200 | -1.25950800 |
| C  | 3.91647100  | -0.36963800 | 1.22766700  |
| H  | -0.07320600 | 3.11478400  | -1.32452300 |
| H  | -0.85398300 | -2.61033700 | 1.36824100  |
| H  | 1.38393500  | -1.46659600 | -2.16546300 |
| H  | 1.83912600  | 1.40815000  | 2.16931700  |
| H  | -0.87539200 | -2.60725100 | -1.33168100 |
| H  | -0.06107800 | 3.10525600  | 1.35729800  |
| H  | 4.39419100  | -1.33863000 | -1.27113100 |
| H  | 4.65992900  | 0.41503000  | -1.26958400 |
| H  | 3.32235400  | -0.27752600 | -2.18004600 |
| H  | 4.67904100  | 0.41145900  | 1.22782200  |
| H  | 4.41276100  | -1.34218400 | 1.22950200  |
| H  | 3.35533200  | -0.28267100 | 2.15705700  |
| H  | -1.76931700 | 0.56773200  | -1.02108400 |
| H  | -1.75828800 | 0.53129700  | 1.00544300  |
| B  | -2.36380600 | 0.86648700  | 0.00057500  |
| H  | -2.63507700 | 2.03223200  | 0.02628800  |
| N  | -3.75409400 | 0.03266600  | -0.00371900 |
| C  | -3.51085800 | -1.43427700 | -0.07276300 |
| H  | -2.97310400 | -1.65991800 | -0.98841900 |
| H  | -2.89244900 | -1.72945300 | 0.76910100  |
| H  | -4.46122300 | -1.97005300 | -0.05219200 |
| C  | -4.56085700 | 0.45127700  | -1.18388700 |
| H  | -5.51062000 | -0.08597500 | -1.19629700 |
| H  | -4.73954500 | 1.52210100  | -1.12866300 |

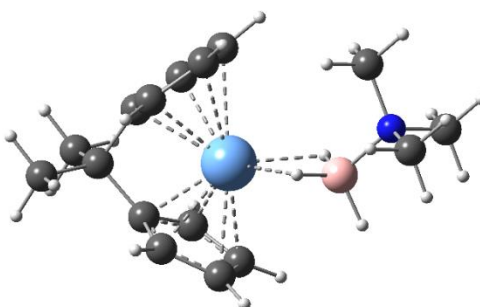

## SUPPORTING INFORMATION

|   |             |             |             |
|---|-------------|-------------|-------------|
| H | -4.00004200 | 0.23066600  | -2.08889400 |
| C | -4.50659800 | 0.34694200  | 1.24282300  |
| H | -4.66629100 | 1.42086000  | 1.29784600  |
| H | -5.46542500 | -0.17405100 | 1.24143300  |
| H | -3.91610900 | 0.03064200  | 2.09923300  |

optimized geometry of 1b·(Me<sub>3</sub>NBH<sub>3</sub>)

|    |             |             |             |
|----|-------------|-------------|-------------|
| Mg | -0.04767800 | 0.20447400  | -0.00922500 |
| C  | 2.07089800  | 1.36528000  | -0.00117500 |
| C  | 1.71105900  | -1.43129900 | 0.00225100  |
| C  | 1.34905900  | 1.80857700  | -1.14858800 |
| C  | 0.88187700  | -1.70413500 | 1.12927000  |
| C  | 0.19947200  | 2.51657300  | -0.73343000 |
| C  | -0.38280600 | -2.14879300 | 0.68318500  |
| C  | 0.91595800  | -1.71584900 | -1.14547500 |
| C  | 1.32784500  | 1.82035900  | 1.12790300  |
| C  | -0.36037500 | -2.15714000 | -0.73338700 |
| C  | 0.18595200  | 2.52406000  | 0.68362100  |
| H  | 1.62044100  | 1.61019900  | -2.17546300 |
| H  | 1.16528400  | -1.57185800 | 2.16328500  |
| C  | 4.17771600  | -0.33419500 | -1.52172700 |
| C  | 4.14050100  | -0.32403300 | 1.57936400  |
| H  | -0.52776900 | 2.99042700  | -1.37410700 |
| H  | -1.19390500 | -2.47689100 | 1.31396400  |
| H  | 1.22852100  | -1.58918000 | -2.17169900 |
| H  | 1.58060100  | 1.63443500  | 2.16186000  |
| H  | -1.15151700 | -2.49080900 | -1.38842500 |
| H  | -0.55225100 | 3.00540200  | 1.30559100  |
| H  | 4.69411000  | -1.29636300 | -1.54938800 |
| H  | 4.92870100  | 0.45846200  | -1.55272400 |
| H  | 3.57288400  | -0.25428400 | -2.42763300 |
| H  | 4.88907500  | 0.47022000  | 1.62451300  |
| H  | 4.65781800  | -1.28504500 | 1.62456700  |
| H  | 3.51373800  | -0.24070100 | 2.46992300  |
| H  | -1.93178300 | 0.40318400  | -0.87472700 |
| H  | -2.08899400 | 0.60302100  | 1.13582500  |
| B  | -2.60145400 | 0.82167100  | 0.05791000  |
| H  | -2.86748700 | 1.98014800  | -0.09845700 |
| N  | -4.00134800 | -0.00574600 | 0.00950800  |
| C  | -3.79006900 | -1.44983900 | 0.29775700  |
| H  | -3.07484000 | -1.85114000 | -0.41272200 |
| H  | -3.38118400 | -1.55199500 | 1.29860600  |
| H  | -4.73708100 | -1.98750900 | 0.22526000  |
| C  | -4.60622200 | 0.14163500  | -1.34298000 |
| H  | -5.57425500 | -0.36114700 | -1.37794100 |
| H  | -4.72803300 | 1.19979300  | -1.56075800 |
| H  | -3.93560700 | -0.29739900 | -2.07759800 |
| C  | -4.92647800 | 0.56433800  | 1.02740400  |
| H  | -5.09657900 | 1.61411900  | 0.80299700  |
| H  | -5.87355600 | 0.02174900  | 1.01783900  |
| H  | -4.46355600 | 0.48204600  | 2.00783600  |
| Si | 3.11069700  | -0.18528200 | 0.01572900  |

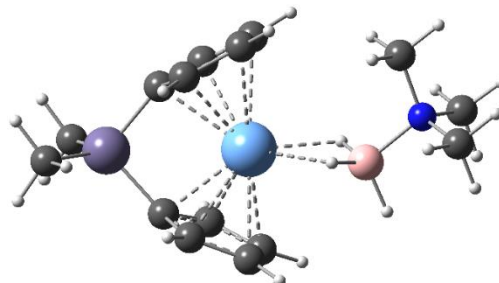optimized geometry of 1c·(Me<sub>3</sub>NBH<sub>3</sub>)

|    |             |             |             |
|----|-------------|-------------|-------------|
| C  | 1.70045100  | 1.41309900  | 0.03500100  |
| C  | 3.24413300  | 0.63664200  | 1.83000000  |
| C  | 4.15908800  | 1.33002300  | -0.35227500 |
| C  | 1.39655700  | -1.41773600 | -0.06232400 |
| C  | 3.22299900  | -1.00967500 | -1.70864000 |
| C  | 3.77223500  | -1.86056200 | 0.53772200  |
| Mg | -0.38091300 | 0.22003300  | -0.06664700 |
| C  | 1.13359400  | 1.70188900  | -1.23175200 |
| C  | 0.80409100  | 1.93885100  | 1.00655300  |
| H  | 2.48181200  | 0.11078500  | 2.40192500  |
| H  | 4.21044200  | 0.19176900  | 2.06322900  |
| H  | 3.26844600  | 1.66867200  | 2.18207700  |
| H  | 5.08761800  | 0.76759500  | -0.22546300 |
| H  | 4.29554200  | 2.30907500  | 0.11048600  |
| H  | 3.99970900  | 1.49501100  | -1.41619200 |
| C  | 0.48451100  | -1.70912500 | -1.11092300 |
| C  | 0.68832500  | -1.60923700 | 1.15087400  |
| H  | 2.65517300  | -0.33089600 | -2.34175800 |
| H  | 4.28119000  | -0.79356600 | -1.84631600 |
| H  | 3.04737500  | -2.02455700 | -2.06804000 |
| H  | 4.80606300  | -1.50952100 | 0.49632600  |
| H  | 3.73735000  | -2.85078900 | 0.07962500  |
| H  | 3.49180800  | -1.97729400 | 1.58281400  |
| H  | 1.55210700  | 1.44057500  | -2.18933000 |
| C  | -0.09398500 | 2.38309600  | -1.04637600 |
| H  | -0.74692800 | 2.74083800  | -1.82677400 |
| C  | -0.29355900 | 2.54021300  | 0.34353700  |
| C  | -0.76492300 | -2.07082500 | -0.55041900 |
| H  | -1.63180400 | -2.38407900 | -1.10824800 |
| C  | -0.63683300 | -2.00634900 | 0.85651300  |
| H  | -1.39394800 | -2.24885500 | 1.58679700  |
| H  | 1.08238100  | -1.46976500 | 2.14391400  |
| H  | 0.92968200  | 1.89655100  | 2.07595200  |
| H  | 0.69373900  | -1.66383300 | -2.16681000 |
| H  | -1.12846400 | 3.03235200  | 0.81460400  |
| C  | 2.96603600  | 0.61321200  | 0.31490900  |
| C  | 2.82438000  | -0.91050300 | -0.22393600 |
| H  | -2.32458600 | 0.44768100  | 0.69351000  |
| H  | -2.67791900 | 0.55441400  | -1.29913400 |
| B  | -3.08020900 | 0.82221500  | -0.19027100 |
| H  | -3.35181700 | 1.98367300  | -0.05244100 |
| N  | -4.45824600 | -0.02015700 | 0.03909500  |
| C  | -5.48003500 | 0.46350700  | -0.92861300 |
| H  | -6.41293000 | -0.08807500 | -0.79689400 |

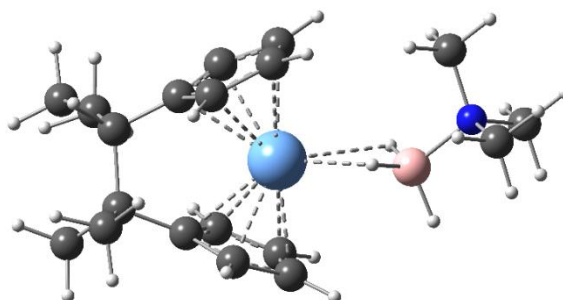

## SUPPORTING INFORMATION

|   |             |             |             |
|---|-------------|-------------|-------------|
| H | -5.64854900 | 1.52452000  | -0.76324000 |
| H | -5.10364400 | 0.31841900  | -1.93831400 |
| C | -4.23334400 | -1.47472800 | -0.17295600 |
| H | -3.89208000 | -1.63067700 | -1.19247500 |
| H | -3.46273400 | -1.81718700 | 0.51099800  |
| H | -5.15928600 | -2.02725600 | -0.00255600 |
| C | -4.94804700 | 0.20429600  | 1.42608200  |
| H | -5.08723300 | 1.27117200  | 1.58217500  |
| H | -5.89176300 | -0.32174600 | 1.58299700  |
| H | -4.20106900 | -0.16191500 | 2.12615200  |

optimized geometry of **1d**·(Me<sub>3</sub>NBH<sub>3</sub>)

|    |             |             |             |
|----|-------------|-------------|-------------|
| C  | 1.37601500  | 1.74487600  | -0.09171200 |
| C  | 3.56421400  | 1.41174800  | 2.00492100  |
| C  | 4.33769000  | 1.83681900  | -0.95520600 |
| C  | 1.07054900  | -1.68077000 | 0.03543500  |
| C  | 3.44049700  | -1.75574300 | -1.88623300 |
| C  | 3.88816300  | -2.28336900 | 1.12355300  |
| Mg | -0.45808000 | 0.18999000  | -0.06625400 |
| C  | 0.69185000  | 1.82069900  | -1.34025600 |
| C  | 0.43389900  | 2.14766800  | 0.90091300  |
| H  | 2.86217500  | 0.95206100  | 2.70440500  |
| H  | 4.55882900  | 1.02051600  | 2.23019000  |
| H  | 3.57129900  | 2.48785600  | 2.19577000  |
| H  | 5.33109400  | 1.40165700  | -0.82064800 |
| H  | 4.40943900  | 2.91305900  | -0.78001800 |
| H  | 4.04758600  | 1.68612000  | -1.99727500 |
| C  | 0.14279900  | -1.89835300 | -1.02338800 |
| C  | 0.30210800  | -1.65033100 | 1.23554900  |
| H  | 2.86891300  | -1.20759500 | -2.63857400 |
| H  | 4.49601500  | -1.51926300 | -2.03817500 |
| H  | 3.30078700  | -2.82387100 | -2.07078400 |
| H  | 4.95358100  | -2.04863800 | 1.05943900  |
| H  | 3.76455600  | -3.35672500 | 0.95982200  |
| H  | 3.56040400  | -2.05965300 | 2.14110900  |
| H  | 1.11238200  | 1.57175900  | -2.30364100 |
| C  | -0.63302300 | 2.26661100  | -1.11985100 |
| H  | -1.38819900 | 2.43262300  | -1.87164300 |
| C  | -0.79288500 | 2.47257800  | 0.27543400  |
| C  | -1.16138100 | -2.00566100 | -0.48631300 |
| H  | -2.06365500 | -2.18551100 | -1.04718500 |
| C  | -1.06181100 | -1.85239600 | 0.92135300  |
| H  | -1.87523100 | -1.89049100 | 1.62845400  |
| H  | 0.69328400  | -1.49119700 | 2.22962500  |
| H  | 0.62671100  | 2.20117700  | 1.96188200  |
| H  | 0.39230400  | -1.96644400 | -2.07144100 |
| H  | -1.69071300 | 2.81687000  | 0.76169500  |
| H  | -3.07167300 | 0.49619900  | 0.94356500  |
| H  | -3.15675300 | 0.41503700  | -1.06704400 |
| B  | -3.69841100 | 0.79185200  | -0.05085100 |
| H  | -3.98627400 | 1.96319300  | -0.08318900 |
| N  | -5.11697800 | -0.02852700 | 0.04544100  |
| C  | -5.96712600 | 0.31956100  | -1.12261100 |
| H  | -6.91554300 | -0.22047900 | -1.07676300 |
| H  | -6.14926100 | 1.39124200  | -1.11780000 |
| H  | -5.43527400 | 0.05695400  | -2.03386600 |
| C  | -4.86215700 | -1.49202800 | 0.04882100  |
| H  | -4.36807800 | -1.76431300 | -0.87962500 |
| H  | -4.20565900 | -1.73493700 | 0.87984100  |
| H  | -5.80134000 | -2.04153500 | 0.14233100  |
| C  | -5.82014200 | 0.35176400  | 1.29838200  |
| H  | -5.98332600 | 1.42667700  | 1.29713900  |
| H  | -6.77676400 | -0.17043100 | 1.37095100  |
| H  | -5.19118500 | 0.09201700  | 2.14629500  |
| Si | 3.08133700  | 1.04854900  | 0.21462900  |
| Si | 2.89165400  | -1.29179400 | -0.13865500 |

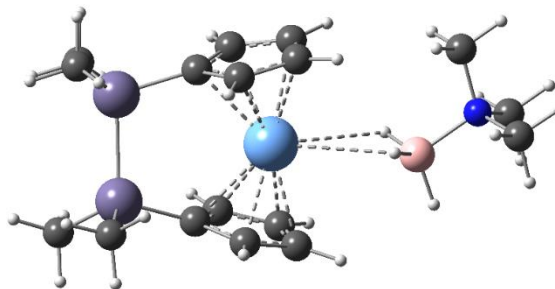optimized geometry of **1a**·dme·2a

|    |             |             |             |
|----|-------------|-------------|-------------|
| Mg | 0.78760000  | -0.22378500 | -0.06599600 |
| C  | -1.57060100 | 0.86167700  | 2.23095600  |
| C  | -2.81729400 | 1.18820600  | 1.70240000  |
| C  | -1.07549900 | -0.26784500 | 1.51319100  |
| H  | -1.07076200 | 1.36473100  | 3.04720500  |
| C  | -3.12307600 | 0.25551900  | 0.66519700  |
| H  | -3.44787400 | 2.01000300  | 2.01618400  |
| C  | -2.07387300 | -0.65726500 | 0.56192200  |
| H  | -0.37963600 | -0.97918200 | 1.93490900  |
| H  | -4.01906400 | 0.26747900  | 0.06154900  |
| C  | 0.49101700  | -2.65714400 | 0.14129300  |
| C  | -0.52275300 | -2.12757600 | -0.69583100 |
| C  | 1.73898500  | -2.53588500 | -0.51686800 |
| H  | 0.33788800  | -3.09558000 | 1.11492400  |
| C  | 0.12180700  | -1.67496500 | -1.87841200 |
| C  | 1.50714100  | -1.94183300 | -1.77067200 |
| H  | 2.69110600  | -2.88137500 | -0.14163100 |
| H  | -0.36409000 | -1.23234700 | -2.73308000 |
| H  | 2.25308700  | -1.73410900 | -2.52152100 |
| C  | -1.98087300 | -1.90333200 | -0.31540300 |
| C  | -2.84370300 | -1.74497300 | -1.57706500 |
| H  | -2.73890600 | -2.61737800 | -2.22476600 |
| H  | -3.89692500 | -1.64225600 | -1.31125700 |
| H  | -2.55876600 | -0.85958800 | -2.14732700 |
| C  | -2.51454400 | -3.11709600 | 0.47813800  |
| H  | -3.56000000 | -2.95505800 | 0.74710200  |
| H  | -2.43795600 | -4.03251200 | -0.11371600 |
| H  | -1.95561700 | -3.25859100 | 1.40304500  |
| H  | 0.74722100  | 2.17457300  | 0.22512400  |
| H  | 0.06780400  | 1.14341900  | -1.38475200 |

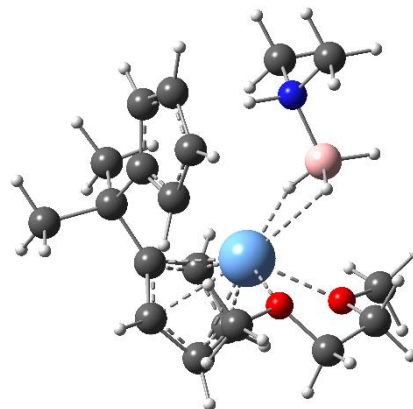



## SUPPORTING INFORMATION

|   |             |             |             |
|---|-------------|-------------|-------------|
| B | 0.14897400  | 2.22791600  | -0.82645400 |
| H | 0.64922800  | 3.02146700  | -1.58660800 |
| N | -1.34409600 | 2.67292200  | -0.51541000 |
| H | -1.74242000 | 2.00169900  | 0.16467900  |
| C | -2.20989600 | 2.63243200  | -1.71507500 |
| H | -3.23301000 | 2.89720800  | -1.44790100 |
| H | -1.82461600 | 3.33091000  | -2.45702900 |
| H | -2.19756900 | 1.62415100  | -2.11927900 |
| C | -1.39470900 | 3.99628800  | 0.14516800  |
| H | -0.96838700 | 4.74463800  | -0.52153700 |
| H | -2.42518300 | 4.25667300  | 0.38823000  |
| H | -0.81102100 | 3.94862500  | 1.06105200  |
| O | 2.16965600  | 0.13795100  | 1.65739900  |
| C | 2.02118200  | -0.54969300 | 2.90550200  |
| H | 0.99650000  | -0.41034400 | 3.23198000  |
| H | 2.23200100  | -1.61481600 | 2.77971200  |
| H | 2.69951200  | -0.11999300 | 3.64632400  |
| C | 3.53715800  | 0.26658200  | 1.26197200  |
| H | 4.12423100  | 0.68925400  | 2.08320900  |
| H | 3.93416400  | -0.72021700 | 1.00173300  |
| C | 3.58167900  | 1.18464000  | 0.06847500  |
| H | 3.25301300  | 2.19486100  | 0.33536400  |
| H | 4.60412800  | 1.22937200  | -0.32147400 |
| O | 2.70264300  | 0.63379200  | -0.89923400 |
| C | 2.88250600  | 1.14598600  | -2.21893500 |
| H | 2.79432500  | 2.23374200  | -2.22444500 |
| H | 3.85960700  | 0.84045000  | -2.60377300 |
| H | 2.09427800  | 0.71920300  | -2.83117300 |

## optimized geometry of I1·dme

|    |             |             |             |
|----|-------------|-------------|-------------|
| Mg | 1.02058500  | -0.53633300 | -0.23198000 |
| C  | -3.72591600 | 1.08504700  | 2.00947900  |
| C  | -4.39985400 | 1.72328100  | 0.87928600  |
| C  | -2.70776100 | 0.33896300  | 1.54980400  |
| H  | -4.01182000 | 1.20542500  | 3.04565000  |
| C  | -3.79167000 | 1.35152600  | -0.25918600 |
| H  | -5.23947000 | 2.39931700  | 0.96367500  |
| C  | -2.62429800 | 0.44845400  | 0.04937200  |
| H  | -2.04247600 | -0.25593600 | 2.15106700  |
| H  | -4.04266300 | 1.68980200  | -1.25196900 |
| C  | -0.64434000 | -2.08086400 | 0.66467900  |
| C  | -1.17940600 | -1.58314100 | -0.55573700 |
| C  | 0.54804100  | -2.79045500 | 0.39092900  |
| H  | -1.09971400 | -2.00061100 | 1.63742000  |
| C  | -0.28326700 | -1.98986300 | -1.58005300 |
| C  | 0.77256300  | -2.73551500 | -1.00199500 |
| H  | 1.16439700  | -3.29784500 | 1.11738600  |
| H  | -0.37969300 | -1.76852300 | -2.62946600 |
| H  | 1.59531200  | -3.18719200 | -1.53440400 |
| C  | -2.52704900 | -0.89515400 | -0.76105200 |
| C  | -2.72671500 | -0.57929900 | -2.25218900 |
| H  | -2.62046100 | -1.48533600 | -2.84955200 |
| H  | -3.72858500 | -0.19061700 | -2.43054800 |
| H  | -2.00156400 | 0.15485200  | -2.60639500 |
| C  | -3.64934300 | -1.85144300 | -0.31272900 |
| H  | -4.62425400 | -1.36734300 | -0.40572100 |
| H  | -3.64620400 | -2.74977800 | -0.93284100 |
| H  | -3.52016200 | -2.15846700 | 0.72442500  |
| H  | 0.30264600  | 1.20131300  | -0.37464600 |
| H  | -0.04649300 | 1.47229600  | -2.29962000 |
| B  | 0.85825900  | 1.48291300  | -1.50316300 |
| H  | 1.63408500  | 0.54365000  | -1.77335600 |
| N  | 1.60236400  | 2.78033100  | -1.40483800 |
| H  | -1.71700800 | 1.01506600  | -0.20319100 |
| C  | 0.75081900  | 3.93388100  | -1.20441000 |
| H  | 0.28522300  | 3.95784600  | -0.19849100 |
| H  | 1.31675800  | 4.86544200  | -1.32196200 |
| H  | -0.05695200 | 3.93153000  | -1.93730600 |
| C  | 2.73833900  | 2.80140900  | -0.51962700 |
| H  | 3.28919700  | 3.74524600  | -0.60276400 |
| H  | 2.46811700  | 2.67452700  | 0.55015600  |
| H  | 3.42750000  | 1.99389100  | -0.77993400 |
| O  | 1.66682400  | 0.19449700  | 1.67221000  |
| C  | 0.75255500  | 0.64670700  | 2.67353900  |
| H  | -0.06791600 | 1.13001500  | 2.15071500  |
| H  | 0.37446400  | -0.19626200 | 3.25720800  |
| H  | 1.24797300  | 1.36670100  | 3.32861600  |
| C  | 2.84119000  | -0.44902300 | 2.16417000  |
| H  | 3.23912100  | 0.09237000  | 3.02675100  |
| H  | 2.59733200  | -1.47382700 | 2.46184200  |
| C  | 3.84624000  | -0.42827500 | 1.03504000  |
| H  | 4.19117900  | 0.59307000  | 0.85048500  |
| H  | 4.70525800  | -1.06224100 | 1.27847500  |
| O  | 3.17759400  | -0.92312800 | -0.12174000 |
| C  | 3.99742100  | -1.00547300 | -1.28864800 |
| H  | 4.38410800  | -0.02024400 | -1.55892200 |
| H  | 4.82329900  | -1.70041100 | -1.11639900 |
| H  | 3.36396800  | -1.37414300 | -2.09073800 |

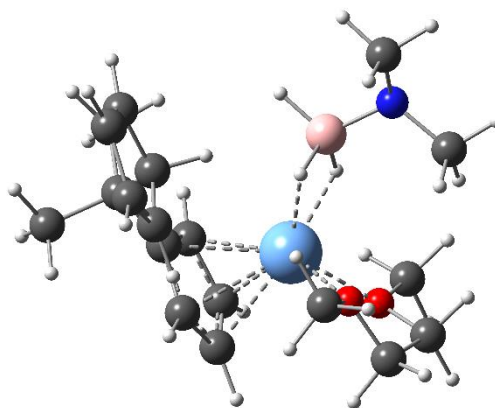

## SUPPORTING INFORMATION

## optimized geometry of I2-dme

|    |             |             |             |
|----|-------------|-------------|-------------|
| Mg | -1.03154100 | -0.32797500 | 0.01519000  |
| C  | 3.62058000  | 2.13564100  | -0.35561300 |
| C  | 4.43943600  | 1.58110900  | 0.72303400  |
| C  | 2.55171800  | 1.34450900  | -0.54735500 |
| H  | 3.84996200  | 3.04186300  | -0.89999700 |
| C  | 3.86313200  | 0.45464100  | 1.17380900  |
| H  | 5.35258400  | 2.02501700  | 1.09485900  |
| C  | 2.58189700  | 0.19323700  | 0.42255400  |
| H  | 1.76534800  | 1.50152200  | -1.26462800 |
| H  | 4.22424500  | -0.16358500 | 1.98036300  |
| C  | 0.46628300  | -0.75780700 | -1.90643500 |
| C  | 0.99776800  | -1.43056900 | -0.76879200 |
| C  | -0.78685500 | -1.32102000 | -2.22636700 |
| H  | 0.96691100  | 0.00071800  | -2.48555200 |
| C  | 0.03436100  | -2.40063800 | -0.39042500 |
| C  | -1.06569600 | -2.32888200 | -1.28105700 |
| H  | -1.42498700 | -1.01242900 | -3.03944800 |
| H  | 0.10393900  | -3.06684400 | 0.45203700  |
| H  | -1.94471500 | -2.95446900 | -1.24776700 |
| C  | 2.38769500  | -1.25373800 | -0.16524000 |
| C  | 2.58582100  | -2.26319300 | 0.97728800  |
| H  | 2.42358000  | -3.27852700 | 0.61424000  |
| H  | 3.60244300  | -2.21508500 | 1.36627400  |
| H  | 1.88998300  | -2.07979200 | 1.79783300  |
| C  | 3.44723200  | -1.51997600 | -1.25050400 |
| H  | 4.45453700  | -1.39497600 | -0.84707200 |
| H  | 3.34690100  | -2.53955700 | -1.62635900 |
| H  | 3.33204500  | -0.83874300 | -2.09209000 |
| H  | -0.72325600 | -1.87833900 | 2.73435000  |
| H  | -0.09458000 | -0.24905600 | 1.82512700  |
| B  | -1.01992500 | -0.73075900 | 2.50740000  |
| H  | -1.11960300 | -0.05707000 | 3.51216100  |
| N  | -2.34355800 | -0.65981700 | 1.61464000  |
| H  | 1.75951500  | 0.32290500  | 1.13986500  |
| C  | -3.18381300 | 0.48175400  | 1.97377100  |
| H  | -4.04326500 | 0.56839000  | 1.30028400  |
| H  | -3.56174700 | 0.39646500  | 3.00071700  |
| H  | -2.60825000 | 1.40457100  | 1.91287100  |
| C  | -3.13550600 | -1.88988700 | 1.66460000  |
| H  | -3.49967200 | -2.09612900 | 2.68008700  |
| H  | -4.00424700 | -1.82149000 | 0.99968000  |
| H  | -2.52542800 | -2.73269300 | 1.34731500  |
| O  | -0.63088100 | 1.78127700  | 0.22538800  |
| C  | -0.04385100 | 2.52843600  | 1.30301800  |
| H  | 0.11745700  | 1.82500300  | 2.11333500  |
| H  | 0.90442200  | 2.96157500  | 0.98183000  |
| H  | -0.73491500 | 3.30878600  | 1.63111000  |
| C  | -1.08361300 | 2.55314000  | -0.89085700 |
| H  | -0.96546900 | 3.62012900  | -0.69781700 |
| H  | -0.48139100 | 2.27868900  | -1.75947900 |
| C  | -2.53712700 | 2.20691700  | -1.13029100 |
| H  | -3.17225700 | 2.58176500  | -0.31964200 |
| H  | -2.87953600 | 2.63410700  | -2.07972400 |
| O  | -2.59337700 | 0.78833300  | -1.16945700 |
| C  | -3.83794100 | 0.23743800  | -1.58121700 |
| H  | -4.64548900 | 0.56138300  | -0.91883300 |
| H  | -4.06484000 | 0.53371800  | -2.60937000 |
| H  | -3.73226700 | -0.84316000 | -1.52848400 |

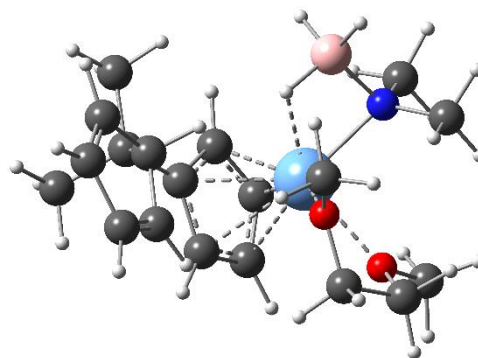

## optimized geometry of TS1

|    |             |             |             |
|----|-------------|-------------|-------------|
| Mg | 1.05305400  | -0.65453500 | -0.11395800 |
| C  | -2.78830800 | 1.05138900  | 1.83040200  |
| C  | -3.38162900 | 1.53703600  | 0.62777900  |
| C  | -2.15759300 | -0.14551300 | 1.55193600  |
| H  | -2.83637300 | 1.53509800  | 2.79682800  |
| C  | -3.11880500 | 0.63182300  | -0.38212400 |
| H  | -3.92870700 | 2.46351900  | 0.52405000  |
| C  | -2.28103300 | -0.42404600 | 0.13957100  |
| H  | -1.67654000 | -0.78518900 | 2.27478400  |
| H  | -3.40954400 | 0.74081500  | -1.41589900 |
| C  | 0.04064900  | -2.52709900 | 0.89844400  |
| C  | -0.63772900 | -2.29005900 | -0.32517700 |
| C  | 1.38612800  | -2.88948900 | 0.62026900  |
| H  | -0.39893500 | -2.48428100 | 1.88074500  |
| C  | 0.31386700  | -2.50275500 | -1.36044000 |
| C  | 1.55174800  | -2.88180900 | -0.77988900 |
| H  | 2.13204300  | -3.16651000 | 1.35018800  |
| H  | 0.12526200  | -2.41241700 | -2.41780700 |
| H  | 2.45879100  | -3.11653100 | -1.31514900 |
| C  | -2.08526500 | -1.81921400 | -0.48600100 |
| C  | -2.44852900 | -1.77064000 | -1.97727300 |
| H  | -2.27058700 | -2.73842500 | -2.44925600 |
| H  | -3.50304200 | -1.52453800 | -2.10114500 |
| H  | -1.86387700 | -1.01630800 | -2.50789500 |
| C  | -3.02214800 | -2.83193300 | 0.20519400  |
| H  | -4.05891900 | -2.50083100 | 0.11712000  |
| H  | -2.92551800 | -3.82177500 | -0.24956400 |
| H  | -2.78862600 | -2.92020600 | 1.26579300  |
| H  | -0.16865000 | 0.59825600  | -0.67769600 |
| H  | 0.84399000  | 2.56788600  | -2.59420500 |
| B  | 0.84256900  | 2.80409300  | -1.42250300 |
| H  | 1.77206600  | 2.49968000  | -0.73739700 |
| N  | -0.20211300 | 3.50889100  | -0.85118100 |
| H  | -1.03348500 | 0.25754700  | -0.33629200 |
| C  | -1.39653100 | 3.90531400  | -1.58355900 |
| H  | -2.26374200 | 3.34940900  | -1.21668800 |

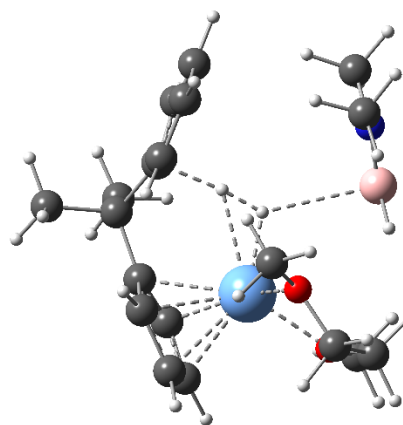



## SUPPORTING INFORMATION

|   |             |             |             |
|---|-------------|-------------|-------------|
| H | -1.59066700 | 4.97505500  | -1.45159500 |
| H | -1.26766800 | 3.70025400  | -2.64410700 |
| C | -0.31683800 | 3.73268900  | 0.58117800  |
| H | -0.53028400 | 4.78542400  | 0.79407600  |
| H | -1.12948200 | 3.12440200  | 0.99372800  |
| H | 0.61319200  | 3.45591000  | 1.07477400  |
| O | 1.83271700  | 0.42270800  | 1.51616700  |
| C | 1.19402000  | 0.47135000  | 2.80040200  |
| H | 0.13227300  | 0.60676300  | 2.60628200  |
| H | 1.36203000  | -0.46044400 | 3.34612800  |
| H | 1.58420300  | 1.31754600  | 3.36973600  |
| C | 3.25799400  | 0.31509400  | 1.54454200  |
| H | 3.67544900  | 1.00297600  | 2.28445700  |
| H | 3.53821100  | -0.71057100 | 1.80607100  |
| C | 3.74995300  | 0.68428600  | 0.16200900  |
| H | 3.60193100  | 1.74989100  | -0.02856200 |
| H | 4.81061600  | 0.43542000  | 0.05732000  |
| O | 2.97600600  | -0.07351500 | -0.76932700 |
| C | 3.30243700  | 0.15162900  | -2.14545500 |
| H | 3.12286100  | 1.19456500  | -2.41060000 |
| H | 4.34481000  | -0.11896700 | -2.32854600 |
| H | 2.64809500  | -0.49357600 | -2.72697600 |

## optimized geometry of TS2

|    |             |             |             |
|----|-------------|-------------|-------------|
| Mg | -0.81956700 | -0.29819400 | -0.04817900 |
| C  | 2.98953000  | 2.36661500  | -0.61739500 |
| C  | 3.48924900  | 2.24201100  | 0.69801400  |
| C  | 2.44961000  | 1.13002500  | -1.00140400 |
| H  | 3.02092300  | 3.26016500  | -1.22707800 |
| C  | 3.27694300  | 0.92323700  | 1.11632700  |
| H  | 3.94585400  | 3.02677000  | 1.28448600  |
| C  | 2.62373900  | 0.20666700  | 0.06559000  |
| H  | 2.06733100  | 0.89682100  | -1.98381200 |
| H  | 3.57466300  | 0.51144600  | 2.06907000  |
| C  | 0.47010700  | -1.39696800 | -1.76434400 |
| C  | 1.04435800  | -1.68770100 | -0.49480600 |
| C  | -0.80880600 | -1.98783700 | -1.83601800 |
| H  | 0.95577200  | -0.86633900 | -2.56535100 |
| C  | 0.07253000  | -2.43072100 | 0.22542400  |
| C  | -1.07315300 | -2.61186900 | -0.60215600 |
| H  | -1.47003600 | -1.94995000 | -2.68770600 |
| H  | 0.19621200  | -2.83059700 | 1.21823700  |
| H  | -1.95234600 | -3.18374400 | -0.35095100 |
| C  | 2.45308100  | -1.31088800 | -0.04099800 |
| C  | 2.77353800  | -1.99556000 | 1.29719800  |
| H  | 2.66193100  | -3.07781800 | 1.20708400  |
| H  | 3.80303000  | -1.78482400 | 1.58617000  |
| H  | 2.12524900  | -1.65366400 | 2.10458000  |
| C  | 3.45849700  | -1.85337300 | -1.08662900 |
| H  | 4.47622000  | -1.60459100 | -0.78035300 |
| H  | 3.37189600  | -2.93941700 | -1.18449100 |
| H  | 3.28692900  | -1.40433000 | -2.06388300 |
| H  | -0.62661500 | -1.19623800 | 3.27420500  |
| H  | 0.51284700  | 0.13152100  | 1.85721400  |
| B  | -1.10655300 | -0.18199400 | 2.88530900  |
| H  | -0.88324500 | 0.86256100  | 3.40714800  |
| N  | -2.18652000 | -0.26003600 | 1.91673000  |
| H  | 1.17397800  | 0.32950100  | 1.41997400  |
| C  | -3.08931800 | 0.90037400  | 1.82164800  |
| H  | -3.66812300 | 0.85456400  | 0.89849900  |
| H  | -3.78724000 | 0.91848400  | 2.66453200  |
| H  | -2.51201600 | 1.81917200  | 1.81969000  |
| C  | -2.95104700 | -1.52194000 | 1.87903900  |
| H  | -3.66165800 | -1.56317100 | 2.71096000  |
| H  | -3.51062800 | -1.60296200 | 0.94625000  |
| H  | -2.27310500 | -2.36601300 | 1.94857100  |
| O  | -0.71102000 | 1.81587900  | 0.04539800  |
| C  | 0.04412400  | 2.70558200  | 0.90646000  |
| H  | -0.01223400 | 2.29331200  | 1.90679100  |
| H  | 1.08160400  | 2.75517200  | 0.57630600  |
| H  | -0.43183900 | 3.68890800  | 0.88577900  |
| C  | -0.93066800 | 2.31222900  | -1.27963000 |
| H  | -0.86867500 | 3.40112900  | -1.29740000 |
| H  | -0.16050600 | 1.90980000  | -1.94131500 |
| C  | -2.31827300 | 1.85802800  | -1.67171300 |
| H  | -3.08646700 | 2.41487300  | -1.12439500 |
| H  | -2.47850700 | 1.98456700  | -2.74676300 |
| O  | -2.40732300 | 0.47381400  | -1.32206700 |
| C  | -3.58023000 | -0.17867100 | -1.80195200 |
| H  | -4.47541600 | 0.30538700  | -1.40038400 |
| H  | -3.60842400 | -0.15508400 | -2.89405500 |
| H  | -3.53027800 | -1.20986000 | -1.46568900 |

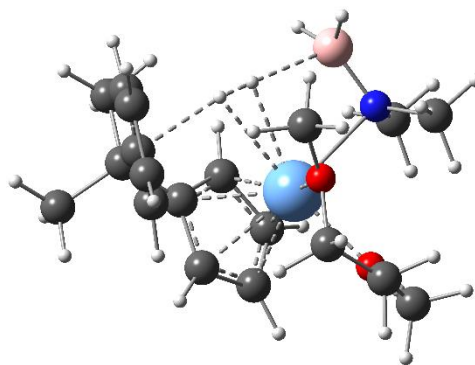

## SUPPORTING INFORMATION

optimized geometry of 1a·dme + 4a + H<sub>2</sub>

|    |             |             |             |
|----|-------------|-------------|-------------|
| Mg | -0.96478200 | 0.67129300  | 0.15063400  |
| C  | 1.25465200  | -1.02694000 | -1.28271700 |
| C  | 1.62774200  | -2.13045100 | -0.53750500 |
| C  | -0.17779700 | -0.91293800 | -1.21904500 |
| H  | 1.91048700  | -0.37857300 | -1.84663400 |
| C  | 0.45087200  | -2.74897900 | -0.01906500 |
| H  | 2.63826300  | -2.46259800 | -0.35034700 |
| C  | -0.65905200 | -2.03962800 | -0.44754400 |
| H  | -0.75353600 | -0.47099700 | -2.03033300 |
| H  | 0.44119100  | -3.60007600 | 0.64608000  |
| C  | -3.27452400 | 0.10945200  | -0.14876800 |
| C  | -2.62875100 | -0.95236900 | 0.52883700  |
| C  | -3.26712900 | 1.25956000  | 0.68366500  |
| H  | -3.70305700 | 0.05623000  | -1.13688200 |
| C  | -2.22556900 | -0.44758500 | 1.79336200  |
| C  | -2.62163300 | 0.91083800  | 1.88925300  |
| H  | -3.72290700 | 2.21222100  | 0.45949600  |
| H  | -1.68860500 | -1.00116100 | 2.54715500  |
| H  | -2.49304500 | 1.55280700  | 2.74777000  |
| C  | -2.13010900 | -2.25808700 | -0.09017200 |
| C  | -2.29702700 | -3.41432800 | 0.90620300  |
| H  | -3.35018800 | -3.53967300 | 1.16470900  |
| H  | -1.93343400 | -4.34860600 | 0.47396300  |
| H  | -1.74042300 | -3.23391500 | 1.82565700  |
| C  | -2.92895400 | -2.59944900 | -1.36250500 |
| H  | -2.56979200 | -3.54149900 | -1.77977600 |
| H  | -3.99526600 | -2.69696500 | -1.14335300 |
| H  | -2.80583500 | -1.83552500 | -2.13096900 |
| H  | 0.94441400  | -0.46234000 | 2.11858800  |
| H  | 3.61493800  | 1.31043800  | 1.07783200  |
| B  | 4.03097100  | 0.86578700  | 0.04937100  |
| H  | 3.88137400  | 1.45548300  | -0.98004500 |
| N  | 4.71995700  | -0.33226500 | 0.05830800  |
| H  | 1.15759000  | -0.84653300 | 1.51235600  |
| C  | 4.91632700  | -1.13229600 | 1.25830500  |
| H  | 4.39801300  | -2.09193400 | 1.17076900  |
| H  | 5.98045400  | -1.33408800 | 1.41878500  |
| H  | 4.52247900  | -0.60661200 | 2.12492200  |
| C  | 5.23580200  | -0.96748800 | -1.14616900 |
| H  | 6.31009500  | -1.15729100 | -1.05291900 |
| H  | 4.73604100  | -1.92453400 | -1.32192800 |
| H  | 5.06509200  | -0.32576200 | -2.00714800 |
| O  | -0.77539800 | 2.21184900  | -1.39027300 |
| C  | -1.78505700 | 2.42303100  | -2.37726200 |
| H  | -2.21166500 | 1.44955300  | -2.60078000 |
| H  | -2.56879000 | 3.07983800  | -1.99062200 |
| H  | -1.34261200 | 2.85369700  | -3.27881800 |
| C  | -0.11804400 | 3.39941500  | -0.95591800 |
| H  | 0.34524000  | 3.91108400  | -1.80579800 |
| H  | -0.84676400 | 4.06828300  | -0.48398300 |
| C  | 0.93463900  | 2.96952900  | 0.03790300  |
| H  | 1.72441000  | 2.38981800  | -0.44188200 |
| H  | 1.37423200  | 3.84368500  | 0.52267100  |
| O  | 0.26890200  | 2.14672700  | 1.00765300  |
| C  | 0.77238000  | 2.22844900  | 2.34437700  |
| H  | 1.80442700  | 1.87968500  | 2.38638800  |
| H  | 0.70299400  | 3.25930400  | 2.69980400  |
| H  | 0.13637800  | 1.59094800  | 2.95220600  |

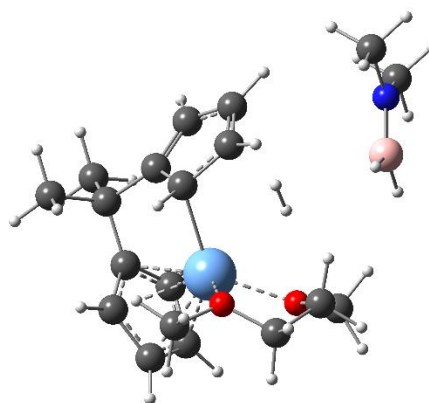

## SUPPORTING INFORMATION

## References

- [1] S. Liu, A. M. Invergo, J. P. McInnis, A. R. Mouat, A. Motta, T. L. Lohr, M. Delferro, T. J. Marks, *Organometallics* **2017**, *36*, 4403-4421.
- [2] a) P. Perrotin, B. Twamley, P. J. Shapiro, *Acta Cryst. E* **2007**, *63*, m1277-m1278. b) P. J. Shapiro, S.-J. Lee, P. Perrotin, T. Cantrell, A. Blumenfeld, B. Twamley, *Polyhedron* **2005**, *24*, 1366-1381. c) W. Haider, V. Huch, A. Schäfer, *Dalton Trans.* **2018**, *47*, 10425-10428.
- [3] C. A. Jaska, K. Temple, A. J. Lough, I. Manners, *J. Am. Chem. Soc.* **2003**, *125*, 9424-9434.
- [4] Y. Duan, R. Bai, J. Tian, L. Chen, X. Yan, *Synth. Commun.* **2014**, *44*, 2555-2564.
- [5] H. C. Johnson, A. P. M. Robertson, A. B. Chaplin, L. J. Sewell, A. L. Thompson, M. F. Haddow, I. Manners, A. S. Weller, *J. Am. Chem. Soc.* **2011**, *133*, 11076-11079.
- [6] A. C. A. Ried, L. J. Taylor, A. M. Geer, H. E. L. Williams, W. Lewis, A. J. Blake, D. L. Kays, *Chem. Eur. J.* **2019**, *25*, 6840-6846.
- [7] G. R. Fulmer, A. J. M. Miller, N. H. Sherden, H. E. Gottlieb, A. Nudelman, Brian M. Stoltz, J. E. Bercaw, K. I. Goldberg, *Organometallics* **2010**, *29*, 2176-2179.
- [8] G. Sheldrick, *Acta Cryst. A* **2008**, *64*, 112-122.
- [9] P. Perrotin, P. J. Shapiro, M. Williams, B. Twamley, *Organometallics* **2007**, *26*, 1823-1826.
- [10] D. J. Liptrot, M. S. Hill, M. F. Mahon, D. J. MacDougall, *Chem. Eur. J.* **2010**, *16*, 8508-8515.
- [11] Gaussian 09, Revision D.01, M. J. Frisch, G. W. Trucks, H. B. Schlegel, G. E. Scuseria, M. A. Robb, J. R. Cheeseman, G. Scalmani, V. Barone, G. A. Petersson, H. Nakatsuji, X. Li, M. Caricato, A. Marenich, J. Bloino, B. G. Janesko, R. Gomperts, B. Mennucci, H. P. Hratchian, J. V. Ortiz, A. F. Izmaylov, J. L. Sonnenberg, D. Williams-Young, F. Ding, F. Lipparini, F. Egidi, J. Goings, B. Peng, A. Petrone, T. Henderson, D. Ranasinghe, V. G. Zakrzewski, J. Gao, N. Rega, G. Zheng, W. Liang, M. Hada, M. Ehara, K. Toyota, R. Fukuda, J. Hasegawa, M. Ishida, T. Nakajima, Y. Honda, O. Kitao, H. Nakai, T. Vreven, K. Throssell, J. A. Montgomery, Jr., J. E. Peralta, F. Ogliaro, M. Bearpark, J. J. Heyd, E. Brothers, K. N. Kudin, V. N. Staroverov, T. Keith, R. Kobayashi, J. Normand, K. Raghavachari, A. Rendell, J. C. Burant, S. S. Iyengar, J. Tomasi, M. Cossi, J. M. Millam, M. Klene, C. Adamo, R. Cammi, J. W. Ochterski, R. L. Martin, K. Morokuma, O. Farkas, J. B. Foresman, D. J. Fox, Gaussian, Inc., Wallingford CT, **2016**.
- [12] a) A. D. Becke, *J. Chem. Phys.* **1993**, *98*, 5648-5652; b) C. Lee, W. Yang, R. G. Parr, *Phys. Rev. B* **1988**, *37*, 785-789; c) S. H. Vosko, L. Wilk, M. Nusair, *Can. J. Phys.* **1980**, *58*, 1200-1211; d) P. J. Stephens, F. J. Devlin, C. F. Chabalowski, M. J. Frisch, *J. Phys. Chem.* **1994**, *98*, 11623-11627; e) S. Grimme, J. Antony, S. Ehrlich, H. Krieg, *J. Chem. Phys.* **2010**, *132*, 154104.
- [13] a) F. Weigend, R. Ahlrichs, *Phys. Chem. Chem. Phys.* **2005**, *7*, 3297-3305; b) F. Weigend, *Phys. Chem. Chem. Phys.* **2006**, *8*, 1057-1065.
